# Supplementary material
Source: ML conference proceedings conference paper supplement (https://openaccess.thecvf.com/content/ICCV2025/html/Cui_Enpowering_Your_Pansharpening_ICCV_2025_paper.html)
Supplement: Supplementary file 1 [file supp-4805.pdf › supp-4805.pdf]

# Empowering Your Pansharpening Models with Generalizability: Unified Distribution is All You Need

## Supplementary Material

### 001 A. More Visual Comparisons

002 Refer to Figs. 1 to 4.

### 003 B. Detailed Results of Pansharpening Models

004 Refer to Tabs. 1 to 12.

### 005 References

- 006 [1] Yongchuan Cui, Peng Liu, Yan Ma, Lajiao Chen, Mengzhen  
007 Xu, and Xingyan Guo. Pansharpening via predictive filtering  
008 with element-wise feature mixing. *ISPRS J. Photogramm.*  
009 *Remote Sens.*, 219:22–37, 2025. 7
- 010 [2] Liang-Jian Deng, Gemine Vivone, Cheng Jin, and Jocelyn  
011 Chanussot. Detail injection-based deep convolutional neural  
012 networks for pansharpening. *IEEE TGRS*, 59(8):6995–7010,  
013 2021. 5
- 014 [3] Xuanhua He, Keyu Yan, Rui Li, Chengjun Xie, Jie Zhang,  
015 and Man Zhou. Pyramid dual domain injection network for  
016 pan-sharpening. In *ICCV*, pages 12862–12871, 2023. 4
- 017 [4] Xuanhua He, Keyu Yan, Jie Zhang, Rui Li, Chengjun Xie,  
018 Man Zhou, and Danfeng Hong. Multiscale dual-domain guid-  
019 ance network for pan-sharpening. *IEEE TGRS*, 61:1–13, 2023.  
020 4
- 021 [5] Zi-Rong Jin, Tian-Jing Zhang, Tai-Xiang Jiang, Gemine  
022 Vivone, and Liang-Jian Deng. LAGConv: Local-context adap-  
023 tive convolution kernels with global harmonic bias for pan-  
024 sharpening. *AAAI*, 36(1):1113–1121, 2022. 8
- 025 [6] YuJie Liang, ZiHan Cao, Shangqi Deng, Hong-Xia Dou, and  
026 Liang-Jian Deng. Fourier-enhanced implicit neural fusion  
027 network for multispectral and hyperspectral image fusion. In  
028 *NeurIPS*, pages 63441–63465. Curran Associates, Inc., 2024.  
029 7
- 030 [7] Giuseppe Masi, Davide Cozzolino, Luisa Verdoliva, and  
031 Giuseppe Scarpa. Pansharpening by convolutional neural  
032 networks. In *Remote Sens.*, page 594, 2016. 6
- 033 [8] Shuang Xu, Jianshe Zhang, Zixiang Zhao, Kai Sun, Junmin  
034 Liu, and Chunxia Zhang. Deep gradient projection networks  
035 for pan-sharpening. In *CVPR*, pages 1366–1375, 2021. 5
- 036 [9] Gang Yang, Man Zhou, Keyu Yan, Aiping Liu, Xueyang  
037 Fu, and Fan Wang. Memory-augmented deep conditional  
038 unfolding network for pansharpening. In *CVPR*, pages 1778–  
039 1787, 2022. 9
- 040 [10] Jie Yang, Xiao-Yang Fu, Yan Hu, Yue Huang, Xing Ding,  
041 and John Paisley. PanNet: A deep network architecture for  
042 pan-sharpening. *ICCV*, pages 1753–1761, 2017. 4
- 043 [11] Qiangqiang Yuan, Yancong Wei, Xiangchao Meng, Huanfeng  
044 Shen, and Liangpei Zhang. A multiscale and multidepth  
045 convolutional neural network for remote sensing imagery  
046 pan-sharpening. *IEEE JSTARS*, 11(3):978–989, 2018. 6

- [12] Kaiwen Zheng, Jie Huang, Man Zhou, Danfeng Hong, and  
Feng Zhao. Deep adaptive pansharpening via uncertainty-  
aware image fusion. *IEEE TGRS*, 61:1–15, 2023. 9
- [13] Man Zhou, Jie Huang, Keyu Yan, Hu Yu, Xueyang Fu, Aiping  
Liu, Xian Wei, and Feng Zhao. Spatial-frequency domain  
information integration for pan-sharpening. In *ECCV*, pages  
274–291, Cham, 2022. Springer Nature Switzerland. 8

047  
048  
049  
050  
051  
052  
053

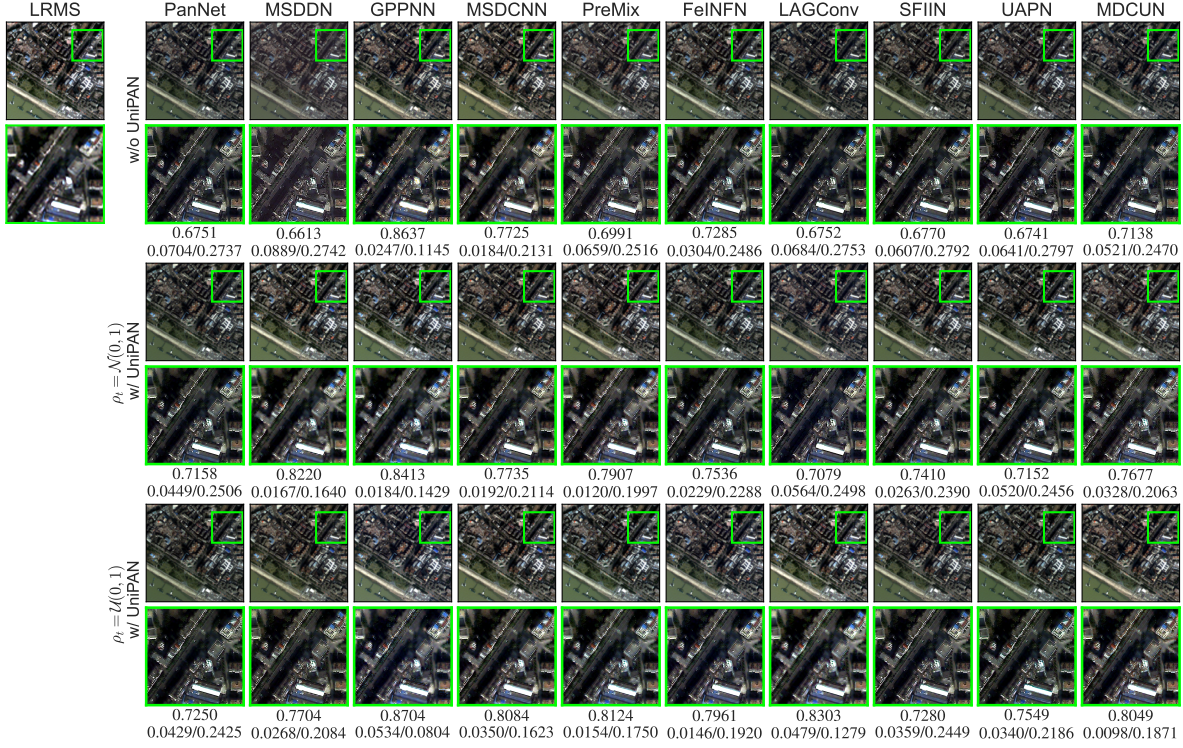

Figure 1. Generalization testing on QuickBird, the networks are trained on IKONOS. The bright green box indicates the zoomed-in area. Below the zoomed-in image, the first line is the QNR value, and the second line is the  $D_\lambda/D_S$  value.

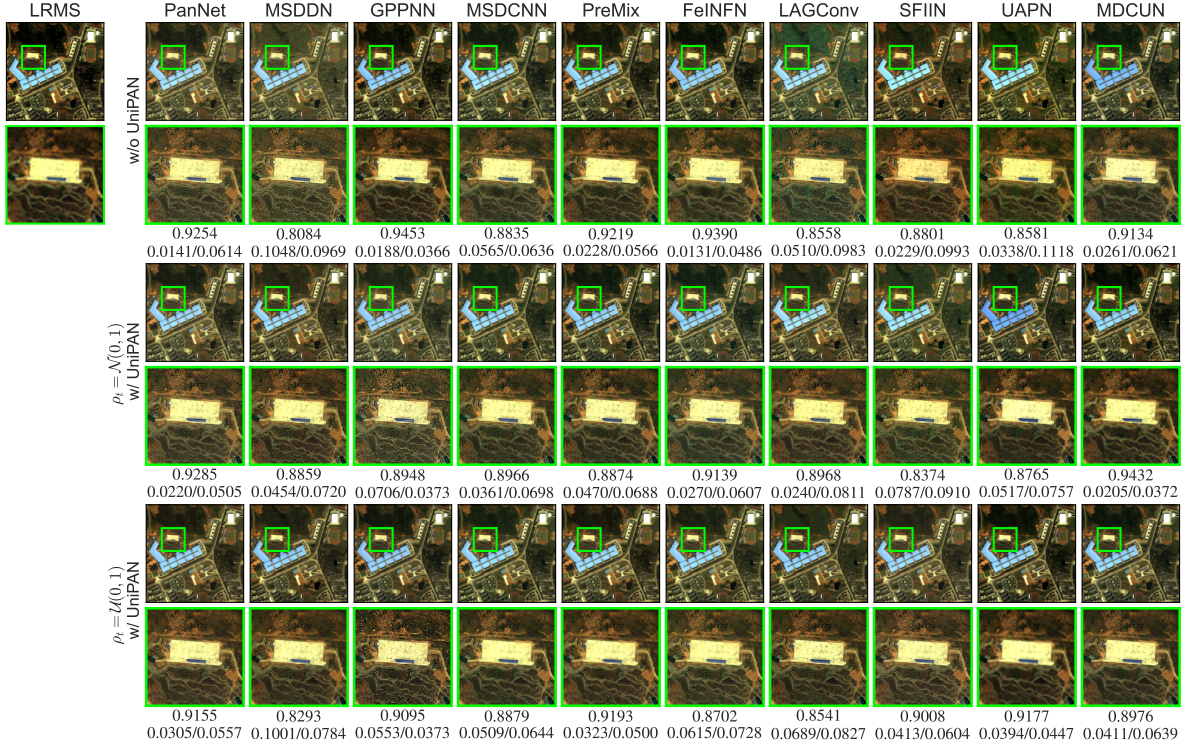

Figure 2. Generalization testing on IKONOS, the networks are trained on WorldView-2. The bright green box indicates the zoomed-in area. Below the zoomed-in image, the first line is the QNR value, and the second line is the  $D_\lambda/D_S$  value.



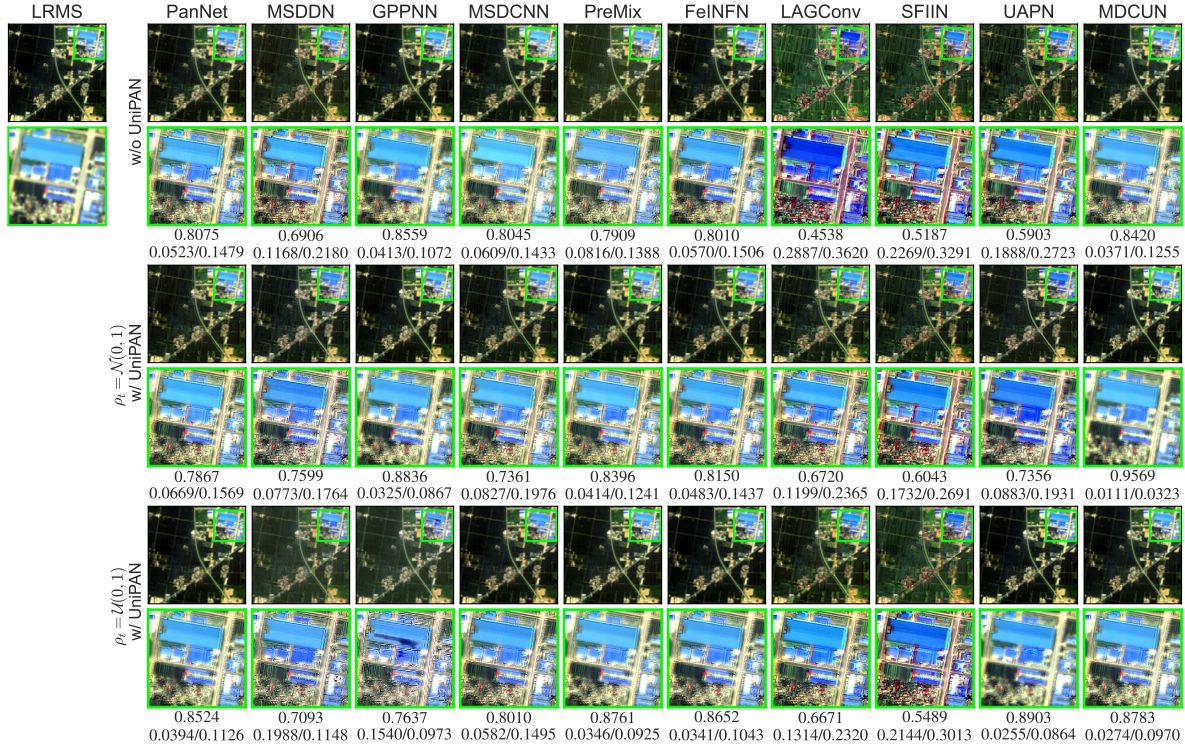

Figure 3. Generalization testing on GaoFen-1, the networks are trained on WorldView-3. The **bright green** box indicates the zoomed-in area. Below the zoomed-in image, the first line is the QNR value, and the second line is the  $D_\lambda/D_S$  value.

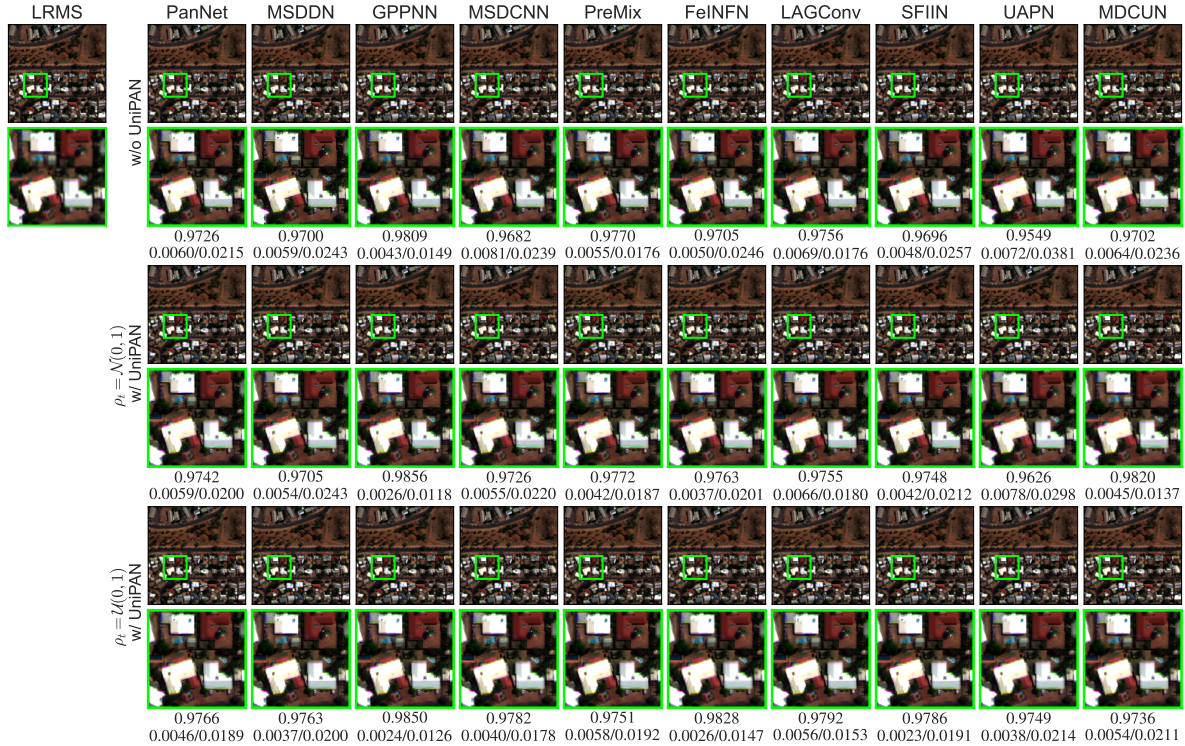

Figure 4. Full-resolution generalization testing on WorldView-4. The **bright green** box indicates the zoomed-in area. Below the zoomed-in image, the first line is the QNR value, and the second line is the  $D_\lambda/D_S$  value.

Table 1. Results of PanNet [10]. Rows correspond to training satellites, and columns correspond to testing satellites. **Green** indicates performance improvement, while **red** indicates performance degradation. The values in parentheses represent the average delta compared to the baseline without UniPAN.

| QNR↑                   | $\rho_t = \mathcal{N}(0, 1)$ |                 |                 |                 |                 |                 | $\rho_t = \mathcal{U}(0, 1)$ |                 |                 |                 |                 |                 |
|------------------------|------------------------------|-----------------|-----------------|-----------------|-----------------|-----------------|------------------------------|-----------------|-----------------|-----------------|-----------------|-----------------|
|                        | GF1                          | IK              | QB              | WV2             | WV3             | WV4             | GF1                          | IK              | QB              | WV2             | WV3             | WV4             |
| GF1                    | 0.9846(+0.0042)              | 0.9556(+0.0034) | 0.9671(+0.0001) | 0.9813(+0.0021) | 0.9758(+0.0019) | 0.9833(+0.0046) | 0.9876(+0.0013)              | 0.9514(+0.0008) | 0.9669(+0.0003) | 0.9872(+0.0080) | 0.9829(+0.0091) | 0.9873(+0.0006) |
| IK                     | 0.9457(+0.0005)              | 0.9080(+0.0334) | 0.8981(+0.0237) | 0.9094(+0.0032) | 0.8912(+0.0031) | 0.9449(+0.0103) | 0.9498(+0.0036)              | 0.9040(+0.0294) | 0.9345(+0.0601) | 0.9470(+0.0409) | 0.9305(+0.0424) | 0.9680(+0.0128) |
| QB                     | 0.9594(+0.0024)              | 0.9259(+0.0070) | 0.9299(+0.0400) | 0.9599(+0.0056) | 0.9462(+0.0099) | 0.9682(+0.0017) | 0.9587(+0.0030)              | 0.9324(+0.0136) | 0.9592(+0.0693) | 0.9741(+0.0198) | 0.9666(+0.0304) | 0.9785(+0.0086) |
| WV2                    | 0.8807(+0.0257)              | 0.7947(+0.0448) | 0.8289(+0.0212) | 0.9363(+0.0030) | 0.9035(+0.0022) | 0.9415(+0.0193) | 0.8783(+0.0233)              | 0.7813(+0.0314) | 0.8251(+0.0174) | 0.9383(+0.0010) | 0.9018(+0.0039) | 0.9427(+0.0205) |
| WV3                    | 0.8840(+0.0261)              | 0.7804(+0.0318) | 0.7368(+0.0280) | 0.9202(+0.0183) | 0.9202(+0.0105) | 0.9573(+0.0100) | 0.9165(+0.0063)              | 0.8294(+0.0172) | 0.8154(+0.0505) | 0.9420(+0.0035) | 0.9160(+0.0063) | 0.9585(+0.0088) |
| WV4                    | 0.9342(+0.0014)              | 0.8727(+0.0118) | 0.8635(+0.0118) | 0.9563(+0.0026) | 0.9335(+0.0056) | 0.9711(+0.0008) | 0.9352(+0.0003)              | 0.8987(+0.0378) | 0.8873(+0.0120) | 0.9543(+0.0006) | 0.9338(+0.0059) | 0.9724(+0.0020) |
| $D_\lambda \downarrow$ | $\rho_t = \mathcal{N}(0, 1)$ |                 |                 |                 |                 |                 | $\rho_t = \mathcal{U}(0, 1)$ |                 |                 |                 |                 |                 |
|                        | GF1                          | IK              | QB              | WV2             | WV3             | WV4             | GF1                          | IK              | QB              | WV2             | WV3             | WV4             |
| GF1                    | 0.0051(+0.0013)              | 0.0113(+0.0009) | 0.0059(+0.0004) | 0.0064(+0.0004) | 0.0062(+0.0003) | 0.0060(+0.0017) | 0.0042(+0.0003)              | 0.0133(+0.0011) | 0.0054(+0.0001) | 0.0040(+0.0028) | 0.0044(+0.0021) | 0.0046(+0.0003) |
| IK                     | 0.0120(+0.0007)              | 0.0216(+0.0111) | 0.0203(+0.0055) | 0.0458(+0.0158) | 0.0366(+0.0090) | 0.0210(+0.0047) | 0.0101(+0.0012)              | 0.0219(+0.0108) | 0.0132(+0.0127) | 0.0140(+0.0160) | 0.0119(+0.0158) | 0.0099(+0.0065) |
| QB                     | 0.0100(+0.0005)              | 0.0120(+0.0025) | 0.0132(+0.0059) | 0.0112(+0.0002) | 0.0099(+0.0016) | 0.0107(+0.0024) | 0.0108(+0.0013)              | 0.0101(+0.0045) | 0.0052(+0.0139) | 0.0041(+0.0069) | 0.0041(+0.0041) | 0.0057(+0.0026) |
| WV2                    | 0.0411(+0.0068)              | 0.0709(+0.0233) | 0.0353(+0.0020) | 0.0110(+0.0025) | 0.0180(+0.0027) | 0.0201(+0.0082) | 0.0419(+0.0059)              | 0.0777(+0.0166) | 0.0357(+0.0024) | 0.0100(+0.0015) | 0.0190(+0.0037) | 0.0185(+0.0097) |
| WV3                    | 0.0397(+0.0090)              | 0.0763(+0.0117) | 0.0585(+0.0006) | 0.0312(+0.0200) | 0.0108(+0.0033) | 0.0122(+0.0043) | 0.0263(+0.0044)              | 0.0576(+0.0071) | 0.0397(+0.0182) | 0.0113(+0.0002) | 0.0123(+0.0018) | 0.0100(+0.0021) |
| WV4                    | 0.0186(+0.0022)              | 0.0397(+0.0023) | 0.0331(+0.0080) | 0.0136(+0.0080) | 0.0121(+0.0029) | 0.0056(+0.0002) | 0.0164(+0.0000)              | 0.0257(+0.0117) | 0.0251(+0.0000) | 0.0066(+0.0010) | 0.0079(+0.0013) | 0.0053(+0.0000) |
| $D_S \downarrow$       | $\rho_t = \mathcal{N}(0, 1)$ |                 |                 |                 |                 |                 | $\rho_t = \mathcal{U}(0, 1)$ |                 |                 |                 |                 |                 |
|                        | GF1                          | IK              | QB              | WV2             | WV3             | WV4             | GF1                          | IK              | QB              | WV2             | WV3             | WV4             |
| GF1                    | 0.0103(+0.0030)              | 0.0339(+0.0023) | 0.0272(+0.0003) | 0.0123(+0.0017) | 0.0182(+0.0016) | 0.0108(+0.0030) | 0.0083(+0.0010)              | 0.0358(+0.0004) | 0.0279(+0.0004) | 0.0088(+0.0052) | 0.0128(+0.0070) | 0.0081(+0.0003) |
| IK                     | 0.0431(+0.0002)              | 0.0730(+0.0244) | 0.0838(+0.0192) | 0.0480(+0.0185) | 0.0754(+0.0116) | 0.0354(+0.0065) | 0.0408(+0.0025)              | 0.0769(+0.0204) | 0.0533(+0.0497) | 0.0397(+0.0268) | 0.0585(+0.0285) | 0.0223(+0.0066) |
| QB                     | 0.0311(+0.0020)              | 0.0633(+0.0048) | 0.0578(+0.0355) | 0.0293(+0.0059) | 0.0444(+0.0115) | 0.0215(+0.0006) | 0.0310(+0.0019)              | 0.0584(+0.0097) | 0.0358(+0.0574) | 0.0219(+0.0133) | 0.0293(+0.0266) | 0.0159(+0.0061) |
| WV2                    | 0.0823(+0.0208)              | 0.1472(+0.0263) | 0.1414(+0.0234) | 0.0534(+0.0007) | 0.0803(+0.0003) | 0.0396(+0.0120) | 0.0839(+0.0192)              | 0.1549(+0.0186) | 0.1447(+0.0201) | 0.0523(+0.0004) | 0.0811(+0.0005) | 0.0398(+0.0117) |
| WV3                    | 0.0806(+0.0192)              | 0.1576(+0.0228) | 0.2195(+0.0294) | 0.0508(+0.0003) | 0.0699(+0.0076) | 0.0311(+0.0060) | 0.0592(+0.0022)              | 0.1220(+0.0122) | 0.1517(+0.0384) | 0.0472(+0.0039) | 0.0728(+0.0047) | 0.0319(+0.0069) |
| WV4                    | 0.0483(+0.0008)              | 0.0921(+0.0143) | 0.1078(+0.0051) | 0.0306(+0.0104) | 0.0553(+0.0084) | 0.0235(+0.0010) | 0.0495(+0.0005)              | 0.0787(+0.0278) | 0.0904(+0.0122) | 0.0394(+0.0016) | 0.0589(+0.0048) | 0.0225(+0.0020) |
| $D_p \downarrow$       | $\rho_t = \mathcal{N}(0, 1)$ |                 |                 |                 |                 |                 | $\rho_t = \mathcal{U}(0, 1)$ |                 |                 |                 |                 |                 |
|                        | GF1                          | IK              | QB              | WV2             | WV3             | WV4             | GF1                          | IK              | QB              | WV2             | WV3             | WV4             |
| GF1                    | 0.0476(+0.0033)              | 0.0825(+0.0016) | 0.0370(+0.0003) | 0.0891(+0.0541) | 0.0599(+0.0141) | 0.0522(+0.0284) | 0.0292(+0.0152)              | 0.0885(+0.0076) | 0.0379(+0.0012) | 0.0218(+0.0132) | 0.0239(+0.0220) | 0.0241(+0.0003) |
| IK                     | 0.0969(+0.0115)              | 0.1238(+0.0166) | 0.1165(+0.0339) | 0.1500(+0.0730) | 0.1520(+0.0430) | 0.0776(+0.0169) | 0.0820(+0.0033)              | 0.1194(+0.0209) | 0.0804(+0.0701) | 0.0700(+0.0070) | 0.0908(+0.0182) | 0.0577(+0.0031) |
| QB                     | 0.0636(+0.0111)              | 0.0722(+0.0032) | 0.1021(+0.0243) | 0.0602(+0.0016) | 0.0744(+0.0022) | 0.0735(+0.0165) | 0.0514(+0.0111)              | 0.0687(+0.0067) | 0.0449(+0.0815) | 0.0227(+0.0391) | 0.0255(+0.0512) | 0.0286(+0.0285) |
| WV2                    | 0.2060(+0.0111)              | 0.2336(+0.0280) | 0.2440(+0.0348) | 0.1171(+0.0004) | 0.1516(+0.0163) | 0.1319(+0.0167) | 0.1868(+0.0304)              | 0.2425(+0.0192) | 0.2317(+0.0471) | 0.1068(+0.0107) | 0.1642(+0.0037) | 0.1230(+0.0256) |
| WV3                    | 0.2277(+0.0630)              | 0.2499(+0.0094) | 0.3016(+0.0470) | 0.2703(+0.1629) | 0.1766(+0.0262) | 0.1171(+0.0147) | 0.1825(+0.0177)              | 0.2394(+0.0012) | 0.2280(+0.0266) | 0.1101(+0.0027) | 0.1351(+0.0153) | 0.1027(+0.0003) |
| WV4                    | 0.1058(+0.0129)              | 0.1559(+0.0005) | 0.1228(+0.0031) | 0.1474(+0.0850) | 0.1760(+0.0093) | 0.0430(+0.0025) | 0.0911(+0.0019)              | 0.1251(+0.0303) | 0.1476(+0.0217) | 0.0480(+0.0144) | 0.0664(+0.0194) | 0.0446(+0.0008) |

Table 2. Results of MSDDN [3, 4]. Rows correspond to training satellites, and columns correspond to testing satellites. **Green** indicates performance improvement, while **red** indicates performance degradation. The values in parentheses represent the average delta compared to the baseline without UniPAN.

| QNR↑                   | $\rho_t = \mathcal{N}(0, 1)$ |                 |                 |                 |                 |                 | $\rho_t = \mathcal{U}(0, 1)$ |                 |                 |                 |                 |                 |
|------------------------|------------------------------|-----------------|-----------------|-----------------|-----------------|-----------------|------------------------------|-----------------|-----------------|-----------------|-----------------|-----------------|
|                        | GF1                          | IK              | QB              | WV2             | WV3             | WV4             | GF1                          | IK              | QB              | WV2             | WV3             | WV4             |
| GF1                    | 0.9750(+0.0003)              | 0.9550(+0.0194) | 0.9878(+0.0121) | 0.9808(+0.0089) | 0.9873(+0.0242) | 0.9795(+0.0078) | 0.9768(+0.0020)              | 0.9423(+0.0068) | 0.9865(+0.0108) | 0.9712(+0.0007) | 0.9748(+0.0117) | 0.9837(+0.0035) |
| IK                     | 0.9530(+0.0209)              | 0.9379(+0.0093) | 0.9321(+0.0901) | 0.9450(+0.0311) | 0.9342(+0.0547) | 0.9735(+0.0336) | 0.9536(+0.0215)              | 0.9167(+0.0780) | 0.9392(+0.0972) | 0.9538(+0.0399) | 0.9422(+0.0628) | 0.9705(+0.0306) |
| QB                     | 0.9614(+0.0074)              | 0.9410(+0.0308) | 0.9448(+0.0506) | 0.9656(+0.0167) | 0.9500(+0.0185) | 0.9781(+0.0102) | 0.9710(+0.0170)              | 0.9447(+0.0345) | 0.9725(+0.0783) | 0.9769(+0.0279) | 0.9726(+0.0411) | 0.9862(+0.0183) |
| WV2                    | 0.8578(+0.0766)              | 0.7590(+0.0441) | 0.7746(+0.1156) | 0.9428(+0.0136) | 0.9058(+0.0241) | 0.9402(+0.0255) | 0.8354(+0.0541)              | 0.7762(+0.0613) | 0.8111(+0.1521) | 0.9472(+0.0180) | 0.9222(+0.0406) | 0.9472(+0.0325) |
| WV3                    | 0.8431(+0.0204)              | 0.7902(+0.0681) | 0.7417(+0.0545) | 0.9188(+0.0207) | 0.9142(+0.0085) | 0.9496(+0.0032) | 0.8395(+0.0240)              | 0.7391(+0.0169) | 0.7274(+0.0402) | 0.9437(+0.0042) | 0.9192(+0.0136) | 0.9415(+0.0112) |
| WV4                    | 0.9048(+0.0733)              | 0.8579(+0.1256) | 0.8526(+0.1253) | 0.9429(+0.0050) | 0.9335(+0.0238) | 0.9683(+0.0120) | 0.9326(+0.1011)              | 0.8698(+0.1375) | 0.8829(+0.1556) | 0.9550(+0.0171) | 0.9346(+0.0249) | 0.9701(+0.0138) |
| $D_\lambda \downarrow$ | $\rho_t = \mathcal{N}(0, 1)$ |                 |                 |                 |                 |                 | $\rho_t = \mathcal{U}(0, 1)$ |                 |                 |                 |                 |                 |
|                        | GF1                          | IK              | QB              | WV2             | WV3             | WV4             | GF1                          | IK              | QB              | WV2             | WV3             | WV4             |
| GF1                    | 0.0067(+0.0002)              | 0.0137(+0.0022) | 0.0049(+0.0038) | 0.0090(+0.0015) | 0.0074(+0.0000) | 0.0086(+0.0042) | 0.0059(+0.0006)              | 0.0139(+0.0020) | 0.0053(+0.0035) | 0.0086(+0.0011) | 0.0056(+0.0017) | 0.0050(+0.0005) |
| IK                     | 0.0088(+0.0130)              | 0.0126(+0.0418) | 0.0145(+0.0271) | 0.0183(+0.0118) | 0.0089(+0.0235) | 0.0081(+0.0128) | 0.0089(+0.0129)              | 0.0179(+0.0365) | 0.0122(+0.0294) | 0.0126(+0.0175) | 0.0091(+0.0233) | 0.0081(+0.0128) |
| QB                     | 0.0095(+0.0026)              | 0.0099(+0.0171) | 0.0105(+0.0148) | 0.0083(+0.0037) | 0.0088(+0.0036) | 0.0051(+0.0040) | 0.0072(+0.0049)              | 0.0106(+0.0165) | 0.0050(+0.0203) | 0.0037(+0.0083) | 0.0037(+0.0087) | 0.0033(+0.0057) |
| WV2                    | 0.0467(+0.0432)              | 0.0884(+0.0303) | 0.0363(+0.0502) | 0.0063(+0.0097) | 0.0129(+0.0167) | 0.0215(+0.0145) | 0.0690(+0.0209)              | 0.0938(+0.0248) | 0.0773(+0.0092) | 0.0093(+0.0067) | 0.0154(+0.0143) | 0.0217(+0.0143) |
| WV3                    | 0.0496(+0.0037)              | 0.0756(+0.0288) | 0.0556(+0.0365) | 0.0297(+0.0119) | 0.0123(+0.0099) | 0.0165(+0.0021) | 0.0617(+0.0158)              | 0.1262(+0.0218) | 0.1018(+0.0098) | 0.0115(+0.0062) | 0.0136(+0.0087) | 0.0178(+0.0034) |
| WV4                    | 0.0262(+0.0297)              | 0.0478(+0.0603) | 0.0321(+0.0536) | 0.0117(+0.0000) | 0.0111(+0.0057) | 0.0051(+0.0051) | 0.0190(+0.0369)              | 0.0368(+0.0713) | 0.0244(+0.0614) | 0.0065(+0.0052) | 0.0090(+0.0077) | 0.0054(+0.0048) |
| $D_S \downarrow$       | $\rho_t = \mathcal{N}(0, 1)$ |                 |                 |                 |                 |                 | $\rho_t = \mathcal{U}(0, 1)$ |                 |                 |                 |                 |                 |
|                        | GF1                          | IK              | QB              | WV2             | WV3             | WV4             | GF1                          | IK              | QB              | WV2             | WV3             | WV4             |
| GF1                    | 0.0184(+0.0005)              | 0.0318(+0.0176) | 0.0073(+0.0085) | 0.0104(+0.0103) | 0.0053(+0.0245) | 0.0120(+0.0037) | 0.0175(+0.0013)              | 0.0445(+0.0049) | 0.0083(+0.0075) | 0.0205(+0.0002) | 0.0197(+0.0101) | 0.0113(+0.0030) |
| IK                     | 0.0388(+0.0089)              | 0.0505(+0.0650) | 0.0545(+0.0679) | 0.0380(+0.0205) | 0.0576(+0.0340) | 0.0186(+0.0216) | 0.0380(+0.0096)              | 0.0676(+0.0479) | 0.0494(+0.0731) | 0.0342(+0.0243) | 0.0492(+0.0423) | 0.0217(+0.0185) |
| QB                     | 0.0296(+0.0050)              | 0.0499(+0.0154) | 0.0452(+0.0378) | 0.0264(+0.0133) | 0.0416(+0.0152) | 0.0169(+0.0064) | 0.0221(+0.0125)              | 0.0456(+0.0197) | 0.0226(+0.0604) | 0.0195(+0.0202) | 0.0237(+0.0331) | 0.0105(+0.0127) |
| WV2                    | 0.1012(+0.0437)              | 0.1690(+0.0240) | 0.1965(+0.0860) | 0.0513(+0.0046) | 0.0826(+0.0092) | 0.0395(+0.0123) | 0.1042(+0.0406)              | 0.1448(+0.0481) | 0.1207(+0.1618) | 0.0440(+0.0119) | 0.0636(+0.0282) | 0.0319(+0.0198) |
| WV3                    | 0.1179(+0.0220)              | 0.1462(+0.0311) | 0.2162(+0.0311) | 0.0546(+0.0109) | 0.0747(+0.0006) | 0.0347(+0.0012) | 0.1066(+0.0107)              | 0.1550(+0.0424) | 0.1917(+0.0556) | 0.0453(+0.0016) | 0.0684(+0.0057) | 0.0416(+0.0082) |
| WV4                    | 0.0716(+0.0495)              | 0.0995(+0.0834) | 0.1197(+0.0868) | 0.0464(+0.0047) | 0.0561(+0.0190) | 0.0267(+0.0072) | 0.0496(+0.0714)              | 0.0979(+0.0850) | 0.0955(+0.1110) | 0.0388(+0.0123) | 0.0570(+0.0181) | 0.0247(+0.0093) |
| $D_p \downarrow$       | $\rho_t = \mathcal{N}(0, 1)$ |                 |                 |                 |                 |                 | $\rho_t = \mathcal{U}(0, 1)$ |                 |                 |                 |                 |                 |
|                        | GF1                          | IK              | QB              | WV2             | WV3             | WV4             | GF1                          | IK              | QB              | WV2             | WV3             | WV4             |
| GF1                    | 0.0300(+0.0058)              | 0.0839(+0.0196) | 0.0161(+0.0248) | 0.0348(+0.0006) | 0.0241(+0.0104) | 0.0336(+0.0023) | 0.0178(+0.0179)              | 0.0563(+0.0080) | 0.0172(+0.0237) | 0.0106(+0.0247) | 0.0123(+0.0223) | 0.0142(+0.0171) |
| IK                     | 0.0555(+0.1097)              | 0.0543(+0.1509) | 0.0580(+0.1446) | 0.1019(+0.0304) | 0.0839(+0.0685) | 0.0396(+0.0585) | 0.0686(+0.0965)              | 0.0910(+0.1202) | 0.0643(+0.1384) | 0.0556(+0.0706) | 0.0652(+0.0872) | 0.0427(+0.0555) |
| QB                     | 0.0460(+0.0191)              | 0.0360(+0.0618) | 0.0451(+0.0397) | 0.0299(+0.0322) | 0.0383(+0.0350) | 0.0228(+0.0263) | 0.0243(+0.0407)              | 0.0411(+0.0567) | 0.0182(+0.0666) | 0.0126(+0.0495) | 0.0121(+0.0566) | 0.0157(+0.0334) |
| WV2                    | 0.1918(+0.1025)              | 0.2472(+0.0947) | 0.2745(+0.1222) | 0.0928(+0.0994) | 0.1141(+0.1427) | 0.1112(+0.0600) | 0.1844(+0.1099)              | 0.2556(+0.1063) | 0.2289(+0.1677) | 0.0951(+0.0970) | 0.1156(+0.1412) | 0.1087(+0.0525) |
| WV3                    | 0.2482(+0.0145)              | 0.2898(+0.0292) | 0.3395(+0.0191) | 0.2248(+0.0669) | 0.1421(+0.0463) | 0.1404(+0.0508) | 0.2105(+0.0232)              | 0.2929(+0.0261) | 0.3614(+0.0028) | 0.0834(+0.0745) | 0.0996(+0.0888) | 0.1169(+0.0197) |
| WV4                    | 0.1342(+0.0641)              | 0.1392(+0.1208) | 0.1332(+0.1361) | 0.1374(+0.0191) | 0.1363(+0.0166) | 0.0324(+0.0587) | 0.0688(+0.1255)              | 0.1371(+0.1430) | 0.1076(+0.1617) | 0.0335(+0.0848) | 0.0441(+0.1098) | 0.0209(+0.0621) |



Table 3. Results of FusionNet [2]. Rows correspond to training satellites, and columns correspond to testing satellites. **Green** indicates performance improvement, while **red** indicates performance degradation. The values in parentheses represent the average delta compared to the baseline without UniPAN.

| QNR↑                   | $\rho_t = \mathcal{N}(0, 1)$ |                 |                 |                 |                 |                 | $\rho_t = \mathcal{U}(0, 1)$ |                 |                 |                 |                 |                 |
|------------------------|------------------------------|-----------------|-----------------|-----------------|-----------------|-----------------|------------------------------|-----------------|-----------------|-----------------|-----------------|-----------------|
|                        | GF1                          | IK              | QB              | WV2             | WV3             | WV4             | GF1                          | IK              | QB              | WV2             | WV3             | WV4             |
| GF1                    | 0.9856(+0.0024)              | 0.9756(+0.0306) | 0.9778(+0.0028) | 0.9603(+0.0129) | 0.9739(+0.0032) | 0.9686(+0.0107) | 0.9889(+0.0009)              | 0.9795(+0.0345) | 0.9786(+0.0037) | 0.9916(+0.0183) | 0.9894(+0.0188) | 0.9891(+0.0098) |
| IK                     | 0.9435(+0.0027)              | 0.8824(+0.0511) | 0.9440(+0.0706) | 0.8900(+0.0435) | 0.8848(+0.0100) | 0.9498(+0.0179) | 0.9506(+0.0098)              | 0.8993(+0.0680) | 0.9391(+0.0657) | 0.9355(+0.0019) | 0.9414(+0.0465) | 0.9692(+0.0373) |
| QB                     | 0.9718(+0.0181)              | 0.9358(+0.0170) | 0.9570(+0.0693) | 0.9459(+0.0129) | 0.9452(+0.0129) | 0.9731(+0.0088) | 0.9706(+0.0168)              | 0.9397(+0.0209) | 0.9747(+0.0870) | 0.9803(+0.0473) | 0.9742(+0.0418) | 0.9834(+0.0191) |
| WV2                    | 0.8669(+0.0055)              | 0.8654(+0.0247) | 0.9118(+0.1007) | 0.9459(+0.0104) | 0.9116(+0.0100) | 0.9732(+0.0239) | 0.9106(+0.0382)              | 0.7858(+0.0549) | 0.9337(+0.1226) | 0.9467(+0.0111) | 0.9122(+0.0105) | 0.9533(+0.0039) |
| WV3                    | 0.8912(+0.0508)              | 0.8236(+0.1092) | 0.9342(+0.1787) | 0.8686(+0.0484) | 0.9078(+0.0045) | 0.9723(+0.0344) | 0.9307(+0.0903)              | 0.8145(+0.1001) | 0.9563(+0.2008) | 0.9336(+0.0166) | 0.9189(+0.0155) | 0.9717(+0.0337) |
| WV4                    | 0.9233(+0.0138)              | 0.8619(+0.0028) | 0.9074(+0.0565) | 0.9319(+0.0187) | 0.8997(+0.0251) | 0.9752(+0.0045) | 0.9374(+0.0004)              | 0.8879(+0.0288) | 0.9374(+0.0865) | 0.9602(+0.0096) | 0.9484(+0.0236) | 0.9730(+0.0024) |
| $D_\lambda \downarrow$ | $\rho_t = \mathcal{N}(0, 1)$ |                 |                 |                 |                 |                 | $\rho_t = \mathcal{U}(0, 1)$ |                 |                 |                 |                 |                 |
|                        | GF1                          | IK              | QB              | WV2             | WV3             | WV4             | GF1                          | IK              | QB              | WV2             | WV3             | WV4             |
| GF1                    | 0.0059(+0.0023)              | 0.0090(+0.0158) | 0.0044(+0.0014) | 0.0188(+0.0065) | 0.0119(+0.0008) | 0.0134(+0.0044) | 0.0047(+0.0011)              | 0.0097(+0.0151) | 0.0041(+0.0016) | 0.0039(+0.0084) | 0.0042(+0.0084) | 0.0052(+0.0037) |
| IK                     | 0.0125(+0.0022)              | 0.0338(+0.0350) | 0.0145(+0.0191) | 0.0549(+0.0339) | 0.0506(+0.0239) | 0.0235(+0.0023) | 0.0085(+0.0017)              | 0.0364(+0.0323) | 0.0177(+0.0159) | 0.0194(+0.0017) | 0.0105(+0.0161) | 0.0092(+0.0166) |
| QB                     | 0.0073(+0.0044)              | 0.0120(+0.0030) | 0.0098(+0.0158) | 0.0190(+0.0007) | 0.0130(+0.0059) | 0.0082(+0.0017) | 0.0087(+0.0031)              | 0.0101(+0.0049) | 0.0067(+0.0189) | 0.0033(+0.0164) | 0.0031(+0.0041) | 0.0043(+0.0055) |
| WV2                    | 0.0550(+0.0148)              | 0.0425(+0.0082) | 0.0207(+0.0251) | 0.0110(+0.0039) | 0.0161(+0.0036) | 0.0107(+0.0028) | 0.0320(+0.0082)              | 0.0812(+0.0305) | 0.0209(+0.0249) | 0.0074(+0.0003) | 0.0176(+0.0051) | 0.0254(+0.0118) |
| WV3                    | 0.0504(+0.0025)              | 0.0650(+0.0350) | 0.0148(+0.0481) | 0.0432(+0.0232) | 0.0212(+0.0058) | 0.0105(+0.0089) | 0.0273(+0.0206)              | 0.0765(+0.0235) | 0.0108(+0.0521) | 0.0185(+0.0016) | 0.0153(+0.0001) | 0.0098(+0.0096) |
| WV4                    | 0.0238(+0.0068)              | 0.0562(+0.0154) | 0.0250(+0.0085) | 0.0205(+0.0122) | 0.0321(+0.0234) | 0.0067(+0.0014) | 0.0185(+0.0015)              | 0.0319(+0.0090) | 0.0117(+0.0218) | 0.0092(+0.0009) | 0.0085(+0.0003) | 0.0056(+0.0002) |
| $D_S \downarrow$       | $\rho_t = \mathcal{N}(0, 1)$ |                 |                 |                 |                 |                 | $\rho_t = \mathcal{U}(0, 1)$ |                 |                 |                 |                 |                 |
|                        | GF1                          | IK              | QB              | WV2             | WV3             | WV4             | GF1                          | IK              | QB              | WV2             | WV3             | WV4             |
| GF1                    | 0.0086(+0.0002)              | 0.0156(+0.0155) | 0.0180(+0.0015) | 0.0221(+0.0074) | 0.0145(+0.0024) | 0.0190(+0.0071) | 0.0064(+0.0020)              | 0.0109(+0.0201) | 0.0173(+0.0021) | 0.0046(+0.0101) | 0.0064(+0.0105) | 0.0057(+0.0062) |
| IK                     | 0.0449(+0.0048)              | 0.0880(+0.0200) | 0.0423(+0.0547) | 0.0596(+0.0132) | 0.0682(+0.0128) | 0.0279(+0.0154) | 0.0414(+0.0083)              | 0.0667(+0.0413) | 0.0443(+0.0527) | 0.0461(+0.0003) | 0.0487(+0.0323) | 0.0218(+0.0215) |
| QB                     | 0.0211(+0.0139)              | 0.0532(+0.0144) | 0.0335(+0.0557) | 0.0362(+0.0124) | 0.0424(+0.0186) | 0.0189(+0.0072) | 0.0211(+0.0139)              | 0.0509(+0.0167) | 0.0188(+0.0704) | 0.0164(+0.0321) | 0.0228(+0.0381) | 0.0123(+0.0138) |
| WV2                    | 0.0842(+0.0080)              | 0.1004(+0.0182) | 0.0694(+0.0815) | 0.0436(+0.0143) | 0.0737(+0.0134) | 0.0163(+0.0214) | 0.0607(+0.0315)              | 0.1480(+0.0294) | 0.0481(+0.1029) | 0.0463(+0.0116) | 0.0717(+0.0155) | 0.0225(+0.0152) |
| WV3                    | 0.0648(+0.0546)              | 0.1231(+0.0867) | 0.0526(+0.1416) | 0.0956(+0.0313) | 0.0730(+0.0098) | 0.0174(+0.0752) | 0.1208(+0.0889)              | 0.0335(+0.1606) | 0.0491(+0.0152) | 0.0602(+0.0156) | 0.0188(+0.0247) | 0.0247(+0.0247) |
| WV4                    | 0.0552(+0.0084)              | 0.0896(+0.0166) | 0.0698(+0.0503) | 0.0497(+0.0082) | 0.0724(+0.0052) | 0.0183(+0.0059) | 0.0452(+0.0016)              | 0.0846(+0.0216) | 0.0517(+0.0684) | 0.0313(+0.0103) | 0.0436(+0.0236) | 0.0216(+0.0026) |
| $D_\rho \downarrow$    | $\rho_t = \mathcal{N}(0, 1)$ |                 |                 |                 |                 |                 | $\rho_t = \mathcal{U}(0, 1)$ |                 |                 |                 |                 |                 |
|                        | GF1                          | IK              | QB              | WV2             | WV3             | WV4             | GF1                          | IK              | QB              | WV2             | WV3             | WV4             |
| GF1                    | 0.0531(+0.0220)              | 0.0544(+0.0942) | 0.0139(+0.0150) | 0.1198(+0.0659) | 0.0822(+0.0291) | 0.0577(+0.0120) | 0.0141(+0.0169)              | 0.0348(+0.1138) | 0.0118(+0.0171) | 0.0150(+0.0390) | 0.0113(+0.0418) | 0.0169(+0.0288) |
| IK                     | 0.0956(+0.0013)              | 0.1172(+0.0656) | 0.0585(+0.1107) | 0.1814(+0.0524) | 0.1590(+0.0300) | 0.0698(+0.0225) | 0.0749(+0.0194)              | 0.1219(+0.0609) | 0.0807(+0.0885) | 0.0544(+0.0746) | 0.0557(+0.0733) | 0.0533(+0.0390) |
| QB                     | 0.0463(+0.0201)              | 0.0433(+0.0215) | 0.0480(+0.0625) | 0.0885(+0.0163) | 0.0863(+0.0071) | 0.0554(+0.0014) | 0.0341(+0.0323)              | 0.0363(+0.0286) | 0.0248(+0.0857) | 0.0193(+0.0529) | 0.0213(+0.0579) | 0.0244(+0.0324) |
| WV2                    | 0.1687(+0.0016)              | 0.1199(+0.0942) | 0.0665(+0.1620) | 0.1795(+0.0780) | 0.1209(+0.0363) | 0.0205(+0.0658) | 0.0852(+0.0819)              | 0.2215(+0.0074) | 0.0417(+0.1868) | 0.1395(+0.0381) | 0.1284(+0.0288) | 0.1215(+0.0372) |
| WV3                    | 0.1615(+0.0486)              | 0.2263(+0.0686) | 0.0545(+0.2010) | 0.3714(+0.1895) | 0.2668(+0.0802) | 0.0499(+0.0856) | 0.1401(+0.0700)              | 0.2862(+0.0086) | 0.0508(+0.2047) | 0.2265(+0.0446) | 0.1979(+0.0114) | 0.0691(+0.0664) |
| WV4                    | 0.1103(+0.0282)              | 0.1589(+0.0170) | 0.1291(+0.0057) | 0.2370(+0.1893) | 0.2429(+0.1770) | 0.0347(+0.0065) | 0.0841(+0.0020)              | 0.1381(+0.0038) | 0.0762(+0.0586) | 0.1167(+0.0690) | 0.0861(+0.0203) | 0.0334(+0.0052) |

Table 4. Results of GPPNN [8]. Rows correspond to training satellites, and columns correspond to testing satellites. **Green** indicates performance improvement, while **red** indicates performance degradation. The values in parentheses represent the average delta compared to the baseline without UniPAN.

| QNR↑                   | $\rho_t = \mathcal{N}(0, 1)$ |                 |                 |                 |                 |                 | $\rho_t = \mathcal{U}(0, 1)$ |                 |                 |                 |                 |                 |
|------------------------|------------------------------|-----------------|-----------------|-----------------|-----------------|-----------------|------------------------------|-----------------|-----------------|-----------------|-----------------|-----------------|
|                        | GF1                          | IK              | QB              | WV2             | WV3             | WV4             | GF1                          | IK              | QB              | WV2             | WV3             | WV4             |
| GF1                    | 0.9744(+0.0161)              | 0.9313(+0.0454) | 0.9765(+0.0159) | 0.9702(+0.0081) | 0.9539(+0.0271) | 0.9876(+0.0025) | 0.9798(+0.0107)              | 0.9445(+0.0321) | 0.9881(+0.0043) | 0.9766(+0.0018) | 0.9749(+0.0060) | 0.9900(+0.0002) |
| IK                     | 0.9521(+0.0110)              | 0.9336(+0.0034) | 0.8993(+0.0151) | 0.9355(+0.0003) | 0.9270(+0.0096) | 0.9671(+0.0025) | 0.9602(+0.0028)              | 0.9464(+0.0095) | 0.9572(+0.0428) | 0.9611(+0.0259) | 0.9563(+0.0197) | 0.9834(+0.0138) |
| QB                     | 0.9571(+0.0047)              | 0.9247(+0.0209) | 0.9540(+0.0167) | 0.9630(+0.0031) | 0.9609(+0.0012) | 0.9784(+0.0005) | 0.9765(+0.0240)              | 0.9376(+0.0081) | 0.9785(+0.0412) | 0.9801(+0.0201) | 0.9770(+0.0173) | 0.9880(+0.0091) |
| WV2                    | 0.8869(+0.0379)              | 0.7864(+0.0294) | 0.8949(+0.0253) | 0.9533(+0.0054) | 0.9252(+0.0047) | 0.9504(+0.0175) | 0.9262(+0.0013)              | 0.7769(+0.0389) | 0.9178(+0.0482) | 0.9537(+0.0057) | 0.9359(+0.0154) | 0.9554(+0.0124) |
| WV3                    | 0.8854(+0.0037)              | 0.8368(+0.0622) | 0.8611(+0.0555) | 0.9179(+0.0149) | 0.9431(+0.0230) | 0.9447(+0.0171) | 0.9090(+0.0272)              | 0.8298(+0.0552) | 0.8541(+0.0485) | 0.9580(+0.0252) | 0.9536(+0.0334) | 0.9548(+0.0069) |
| WV4                    | 0.9367(+0.0017)              | 0.9271(+0.0622) | 0.9181(+0.0252) | 0.9451(+0.0112) | 0.9394(+0.0008) | 0.9801(+0.0044) | 0.9534(+0.0150)              | 0.9019(+0.0369) | 0.8744(+0.0185) | 0.9635(+0.0072) | 0.9541(+0.0139) | 0.9786(+0.0029) |
| $D_\lambda \downarrow$ | $\rho_t = \mathcal{N}(0, 1)$ |                 |                 |                 |                 |                 | $\rho_t = \mathcal{U}(0, 1)$ |                 |                 |                 |                 |                 |
|                        | GF1                          | IK              | QB              | WV2             | WV3             | WV4             | GF1                          | IK              | QB              | WV2             | WV3             | WV4             |
| GF1                    | 0.0105(+0.0061)              | 0.0279(+0.0150) | 0.0057(+0.0025) | 0.0141(+0.0036) | 0.0190(+0.0090) | 0.0044(+0.0013) | 0.0064(+0.0021)              | 0.0182(+0.0052) | 0.0040(+0.0008) | 0.0045(+0.0060) | 0.0050(+0.0050) | 0.0043(+0.0015) |
| IK                     | 0.0127(+0.0040)              | 0.0156(+0.0040) | 0.0349(+0.0127) | 0.0260(+0.0037) | 0.0165(+0.0048) | 0.0117(+0.0005) | 0.0111(+0.0024)              | 0.0197(+0.0001) | 0.0124(+0.0097) | 0.0183(+0.0040) | 0.0184(+0.0030) | 0.0074(+0.0038) |
| QB                     | 0.0128(+0.0037)              | 0.0160(+0.0050) | 0.0107(+0.0025) | 0.0127(+0.0022) | 0.0073(+0.0035) | 0.0051(+0.0009) | 0.0066(+0.0100)              | 0.0172(+0.0063) | 0.0059(+0.0073) | 0.0044(+0.0105) | 0.0043(+0.0065) | 0.0032(+0.0028) |
| WV2                    | 0.0492(+0.0244)              | 0.1004(+0.0313) | 0.0270(+0.0064) | 0.0065(+0.0005) | 0.0131(+0.0001) | 0.0240(+0.0148) | 0.0275(+0.0027)              | 0.1255(+0.0564) | 0.0302(+0.0031) | 0.0095(+0.0025) | 0.0134(+0.0002) | 0.0203(+0.0111) |
| WV3                    | 0.0382(+0.0027)              | 0.0570(+0.0249) | 0.0340(+0.0135) | 0.0305(+0.0146) | 0.0114(+0.0051) | 0.0259(+0.0169) | 0.0453(+0.0098)              | 0.0663(+0.0157) | 0.0601(+0.0126) | 0.0113(+0.0045) | 0.0056(+0.0109) | 0.0215(+0.0126) |
| WV4                    | 0.0227(+0.0005)              | 0.0191(+0.0283) | 0.0272(+0.0038) | 0.0230(+0.0126) | 0.0215(+0.0103) | 0.0038(+0.0011) | 0.0128(+0.0104)              | 0.0345(+0.0129) | 0.0624(+0.0314) | 0.0082(+0.0022) | 0.0075(+0.0038) | 0.0036(+0.0013) |
| $D_S \downarrow$       | $\rho_t = \mathcal{N}(0, 1)$ |                 |                 |                 |                 |                 | $\rho_t = \mathcal{U}(0, 1)$ |                 |                 |                 |                 |                 |
|                        | GF1                          | IK              | QB              | WV2             | WV3             | WV4             | GF1                          | IK              | QB              | WV2             | WV3             | WV4             |
| GF1                    | 0.0155(+0.0103)              | 0.0430(+0.0324) | 0.0180(+0.0136) | 0.0159(+0.0046) | 0.0277(+0.0185) | 0.0080(+0.0039) | 0.0139(+0.0088)              | 0.0380(+0.0275) | 0.0080(+0.0036) | 0.0190(+0.0077) | 0.0203(+0.0111) | 0.0058(+0.0017) |
| IK                     | 0.0360(+0.0073)              | 0.0520(+0.0076) | 0.0696(+0.0044) | 0.0405(+0.0033) | 0.0578(+0.0146) | 0.0214(+0.0020) | 0.0292(+0.0005)              | 0.0347(+0.0097) | 0.0309(+0.0343) | 0.0210(+0.0228) | 0.0259(+0.0172) | 0.0093(+0.0101) |
| QB                     | 0.0306(+0.0015)              | 0.0609(+0.0167) | 0.0359(+0.0145) | 0.0246(+0.0011) | 0.0321(+0.0022) | 0.0167(+0.0014) | 0.0172(+0.0150)              | 0.0462(+0.0020) | 0.0158(+0.0346) | 0.0156(+0.0101) | 0.0188(+0.0111) | 0.0088(+0.0064) |
| WV2                    | 0.0680(+0.0160)              | 0.1289(+0.0023) | 0.0810(+0.0201) | 0.0405(+0.0050) | 0.0627(+0.0047) | 0.0269(+0.0037) | 0.0480(+0.0040)              | 0.1123(+0.0143) | 0.0542(+0.0469) | 0.0373(+0.0082) | 0.0516(+0.0158) | 0.0252(+0.0020) |
| WV3                    | 0.0814(+0.0052)              | 0.1142(+0.0451) | 0.1095(+0.0456) | 0.0553(+0.0030) | 0.0462(+0.0185) | 0.0307(+0.0011) | 0.0485(+0.0381)              | 0.1138(+0.0455) | 0.0924(+0.0627) | 0.0312(+0.0211) | 0.0411(+0.0236) | 0.0247(+0.0049) |
| WV4                    | 0.0418(+0.0023)              | 0.0551(+0.0382) | 0.0567(+0.0222) | 0.0329(+0.0009) | 0.0400(+0.0091) | 0.0162(+0.0033) | 0.0343(+0.0052)              | 0.0675(+0.0258) | 0.0684(+0.0105) | 0.0286(+0.0051) | 0.0388(+0.0103) | 0.0179(+0.0016) |
| $D_\rho \downarrow$    | $\rho_t = \mathcal{N}(0, 1)$ |                 |                 |                 |                 |                 | $\rho_t = \mathcal{U}(0, 1)$ |                 |                 |                 |                 |                 |
|                        | GF1                          | IK              | QB              | WV2             | WV3             | WV4             | GF1                          | IK              | QB              | WV2             | WV3             | WV4             |
| GF1                    | 0.0232(+0.0123)              | 0.0567(+0.0435) | 0.0061(+0.0013) | 0.0504(+0.0388) | 0.0291(+0.0155) | 0.0121(+0.0058) | 0.0124(+0.0014)              | 0.0291(+0.0159) | 0.0044(+0.0005) | 0.0068(+0.0049) | 0.0050(+0.0077) | 0.0049(+0.0013) |
| IK                     | 0.0469(+0.0067)              | 0.0398(+0.0279) | 0.0578(+0.0061) | 0.0664(+0.0094) | 0.0637(+0.0088) | 0.0230(+0.0033) | 0.0408(+0.0006)              | 0.0637(+0.0041) | 0.0260(+0.0257) | 0.0287(+0.0283) | 0.0349(+0.0200) | 0.0223(+0.0040) |
| QB                     | 0.0350(+0.0061)              | 0.0332(+0.0037) | 0.0178(+0.0022) | 0.0311(+0.0523) | 0.0250(+0.0388) | 0.0232(+0.0090) | 0.0163(+0.0125)              | 0.0251(+0.0002) | 0.0062(+0.0137) | 0.0070(+0.0154) | 0.0067(+0.0571) | 0.0065(+0.0236) |
| WV2                    | 0.1386(+0.0377)              | 0.1868(+0.0089) | 0.0853(+0.0027) | 0.0707(+0.0132) | 0.0758(+0.0054) | 0.0815(+0.0446) | 0.0684(+0.0325)              | 0.2187(+0.0707) | 0.0534(+0.0373) | 0.0698(+0.0713) | 0.0779(+0.0032) | 0.0656(+0.0287) |
| WV3                    | 0.1495(+0.0142)              | 0.1390(+0.0030) | 0.1074(+0.0300) | 0.2360(+0.1579) | 0.1258(+0.0315) | 0.0804(+0.0244) | 0.1100(+0.0253)              | 0.1612(+0.0168) | 0.1205(+0.0169) | 0.0952(+0.0231) | 0.0557(+0.0378) | 0.0736(+0.0177) |
| WV4                    | 0.0710(+0.0132)              | 0.0275(+0.0532) | 0.0482(+0.0009) | 0.0920(+0.0648) | 0.0286(+0.0808) | 0.0117(+0.0133) | 0.0250(+0.0329)              | 0.0177(+0.0090) | 0.1445(+0.0553) | 0.0366(+0.0052) | 0.0273(+0.0204) | 0.0317(+0.0001) |

Table 5. Results of MSDCNN [11]. Rows correspond to training satellites, and columns correspond to testing satellites. Green indicates performance improvement, while red indicates performance degradation. The values in parentheses represent the average delta compared to the baseline without UniPAN.

| QNR↑                   | $\rho_t = \mathcal{N}(0, 1)$ |                 |                 |                 |                 |                 | $\rho_t = \mathcal{U}(0, 1)$ |                 |                 |                 |                 |                 |
|------------------------|------------------------------|-----------------|-----------------|-----------------|-----------------|-----------------|------------------------------|-----------------|-----------------|-----------------|-----------------|-----------------|
|                        | GF1                          | IK              | QB              | WV2             | WV3             | WV4             | GF1                          | IK              | QB              | WV2             | WV3             | WV4             |
| GF1                    | 0.9830(+0.0207)              | 0.9444(+0.0008) | 0.9606(+0.0010) | 0.9576(+0.0136) | 0.9630(+0.0012) | 0.9724(+0.0117) | 0.9867(+0.0244)              | 0.9670(+0.0218) | 0.9652(+0.0057) | 0.9851(+0.0138) | 0.9802(+0.0160) | 0.9868(+0.0028) |
| IK                     | 0.9486(+0.0008)              | 0.9208(+0.0028) | 0.9008(+0.0292) | 0.9513(+0.0291) | 0.9297(+0.0284) | 0.9718(+0.0077) | 0.9545(+0.0052)              | 0.9257(+0.0077) | 0.9387(+0.0672) | 0.9632(+0.0410) | 0.9533(+0.0521) | 0.9800(+0.0159) |
| QB                     | 0.9504(+0.0211)              | 0.9259(+0.0050) | 0.8956(+0.0336) | 0.9631(+0.0863) | 0.9492(+0.0420) | 0.9736(+0.0819) | 0.9558(+0.0265)              | 0.9428(+0.0219) | 0.9363(+0.0743) | 0.9229(+0.0461) | 0.9344(+0.0272) | 0.8430(+0.0487) |
| WV2                    | 0.8800(+0.0048)              | 0.8255(+0.0070) | 0.7815(+0.0146) | 0.9492(+0.0098) | 0.9163(+0.0034) | 0.9486(+0.0122) | 0.8655(+0.0193)              | 0.7906(+0.0419) | 0.8354(+0.0394) | 0.9552(+0.0159) | 0.9237(+0.0107) | 0.9410(+0.0046) |
| WV3                    | 0.8496(+0.0025)              | 0.7930(+0.0192) | 0.7259(+0.0081) | 0.9389(+0.0029) | 0.9182(+0.0105) | 0.9524(+0.0020) | 0.8498(+0.0023)              | 0.7526(+0.0212) | 0.7729(+0.0390) | 0.9398(+0.0038) | 0.9117(+0.0040) | 0.9519(+0.0026) |
| WV4                    | 0.9214(+0.0225)              | 0.8918(+0.0033) | 0.8393(+0.0388) | 0.9410(+0.0135) | 0.8779(+0.0494) | 0.9701(+0.0038) | 0.9438(+0.0001)              | 0.9001(+0.0116) | 0.8964(+0.0183) | 0.8461(+0.0183) | 0.8155(+0.0117) | 0.9728(+0.0065) |
| $D_\lambda \downarrow$ | $\rho_t = \mathcal{N}(0, 1)$ |                 |                 |                 |                 |                 | $\rho_t = \mathcal{U}(0, 1)$ |                 |                 |                 |                 |                 |
|                        | GF1                          | IK              | QB              | WV2             | WV3             | WV4             | GF1                          | IK              | QB              | WV2             | WV3             | WV4             |
| GF1                    | 0.0062(+0.0105)              | 0.0278(+0.0106) | 0.0057(+0.0000) | 0.0175(+0.0076) | 0.0116(+0.0040) | 0.0097(+0.0045) | 0.0052(+0.0115)              | 0.0140(+0.0032) | 0.0056(+0.0001) | 0.0034(+0.0064) | 0.0035(+0.0041) | 0.0048(+0.0005) |
| IK                     | 0.0117(+0.0024)              | 0.0157(+0.0002) | 0.0157(+0.0095) | 0.0105(+0.0123) | 0.0094(+0.0100) | 0.0075(+0.0029) | 0.0083(+0.0010)              | 0.0179(+0.0024) | 0.0122(+0.0129) | 0.0071(+0.0157) | 0.0064(+0.0130) | 0.0043(+0.0061) |
| QB                     | 0.0137(+0.0164)              | 0.0124(+0.0012) | 0.0261(+0.0215) | 0.0093(+0.0564) | 0.0086(+0.0247) | 0.0067(+0.0466) | 0.0141(+0.0159)              | 0.0091(+0.0044) | 0.0231(+0.0245) | 0.0356(+0.0301) | 0.0289(+0.0043) | 0.0883(+0.0349) |
| WV2                    | 0.0372(+0.0047)              | 0.0555(+0.0040) | 0.0515(+0.0012) | 0.0058(+0.0033) | 0.0119(+0.0008) | 0.0180(+0.0012) | 0.0486(+0.0067)              | 0.0726(+0.0211) | 0.0406(+0.0097) | 0.0052(+0.0039) | 0.0112(+0.0015) | 0.0197(+0.0004) |
| WV3                    | 0.0477(+0.0023)              | 0.0649(+0.0139) | 0.0682(+0.0030) | 0.0141(+0.0002) | 0.0130(+0.0014) | 0.0127(+0.0011) | 0.0519(+0.0019)              | 0.0864(+0.0076) | 0.0558(+0.0154) | 0.0125(+0.0013) | 0.0141(+0.0004) | 0.0140(+0.0023) |
| WV4                    | 0.0236(+0.0098)              | 0.0335(+0.0057) | 0.0372(+0.0145) | 0.0186(+0.0104) | 0.0254(+0.0160) | 0.0052(+0.0022) | 0.0167(+0.0029)              | 0.0316(+0.0039) | 0.0225(+0.0003) | 0.0966(+0.0884) | 0.1129(+0.1035) | 0.0045(+0.0029) |
| $D_S \downarrow$       | $\rho_t = \mathcal{N}(0, 1)$ |                 |                 |                 |                 |                 | $\rho_t = \mathcal{U}(0, 1)$ |                 |                 |                 |                 |                 |
|                        | GF1                          | IK              | QB              | WV2             | WV3             | WV4             | GF1                          | IK              | QB              | WV2             | WV3             | WV4             |
| GF1                    | 0.0110(+0.0117)              | 0.0294(+0.0091) | 0.0339(+0.0011) | 0.0256(+0.0065) | 0.0258(+0.0026) | 0.0182(+0.0074) | 0.0081(+0.0145)              | 0.0193(+0.0191) | 0.0293(+0.0056) | 0.0115(+0.0076) | 0.0163(+0.0120) | 0.0085(+0.0023) |
| IK                     | 0.0403(+0.0016)              | 0.0651(+0.0029) | 0.0854(+0.0212) | 0.0387(+0.0180) | 0.0616(+0.0196) | 0.0208(+0.0049) | 0.0377(+0.0043)              | 0.0576(+0.0104) | 0.0500(+0.0566) | 0.0299(+0.0268) | 0.0405(+0.0407) | 0.0158(+0.0100) |
| QB                     | 0.0366(+0.0078)              | 0.0630(+0.0040) | 0.0808(+0.0152) | 0.0279(+0.0368) | 0.0427(+0.0194) | 0.0198(+0.0437) | 0.0308(+0.0136)              | 0.0487(+0.0183) | 0.0468(+0.0492) | 0.0442(+0.0204) | 0.0399(+0.0222) | 0.0978(+0.0343) |
| WV2                    | 0.0868(+0.0094)              | 0.1293(+0.0031) | 0.1779(+0.0150) | 0.0453(+0.0068) | 0.0729(+0.0026) | 0.0342(+0.0115) | 0.0913(+0.0139)              | 0.1507(+0.0245) | 0.1309(+0.0320) | 0.0398(+0.0123) | 0.0660(+0.0095) | 0.0404(+0.0053) |
| WV3                    | 0.1123(+0.0077)              | 0.1538(+0.0085) | 0.2244(+0.0125) | 0.0482(+0.0026) | 0.0699(+0.0054) | 0.0354(+0.0010) | 0.1060(+0.0014)              | 0.1785(+0.0162) | 0.1824(+0.0294) | 0.0484(+0.0025) | 0.0756(+0.0036) | 0.0348(+0.0004) |
| WV4                    | 0.0589(+0.0158)              | 0.0785(+0.0086) | 0.1298(+0.0278) | 0.0422(+0.0044) | 0.1022(+0.0381) | 0.0249(+0.0017) | 0.0405(+0.0026)              | 0.0718(+0.0153) | 0.0833(+0.0188) | 0.0876(+0.0498) | 0.1152(+0.0511) | 0.0228(+0.0038) |
| $D_p \downarrow$       | $\rho_t = \mathcal{N}(0, 1)$ |                 |                 |                 |                 |                 | $\rho_t = \mathcal{U}(0, 1)$ |                 |                 |                 |                 |                 |
|                        | GF1                          | IK              | QB              | WV2             | WV3             | WV4             | GF1                          | IK              | QB              | WV2             | WV3             | WV4             |
| GF1                    | 0.0611(+0.0217)              | 0.1663(+0.0605) | 0.0414(+0.0002) | 0.1760(+0.1299) | 0.1342(+0.0768) | 0.0645(+0.0387) | 0.0278(+0.0116)              | 0.0829(+0.0230) | 0.0377(+0.0035) | 0.0206(+0.0255) | 0.0280(+0.0293) | 0.0233(+0.0025) |
| IK                     | 0.1040(+0.0240)              | 0.1054(+0.0063) | 0.1206(+0.0298) | 0.1268(+0.0243) | 0.1266(+0.0017) | 0.0706(+0.0099) | 0.0733(+0.0068)              | 0.1040(+0.0049) | 0.0766(+0.0738) | 0.0546(+0.0478) | 0.0615(+0.0634) | 0.0438(+0.0170) |
| QB                     | 0.0951(+0.0167)              | 0.0781(+0.0031) | 0.1287(+0.0247) | 0.0718(+0.1278) | 0.0771(+0.0636) | 0.0709(+0.0835) | 0.0580(+0.0204)              | 0.0659(+0.0153) | 0.0428(+0.1107) | 0.0756(+0.1241) | 0.0789(+0.0618) | 0.1111(+0.0433) |
| WV2                    | 0.2202(+0.0035)              | 0.2449(+0.0021) | 0.3014(+0.0514) | 0.1382(+0.0280) | 0.1660(+0.0056) | 0.1344(+0.0131) | 0.2086(+0.0082)              | 0.2360(+0.0110) | 0.1941(+0.0559) | 0.0821(+0.0281) | 0.1191(+0.0598) | 0.1070(+0.0405) |
| WV3                    | 0.2442(+0.0330)              | 0.2383(+0.0237) | 0.3089(+0.0325) | 0.1743(+0.0645) | 0.1870(+0.0390) | 0.1162(+0.0010) | 0.2278(+0.0165)              | 0.2720(+0.0099) | 0.2837(+0.0073) | 0.1261(+0.0163) | 0.1514(+0.0035) | 0.1287(+0.0116) |
| WV4                    | 0.1393(+0.0527)              | 0.1604(+0.0389) | 0.1463(+0.0056) | 0.1981(+0.1486) | 0.2588(+0.1821) | 0.0505(+0.0005) | 0.0896(+0.0030)              | 0.1512(+0.0298) | 0.1240(+0.0167) | 0.1356(+0.0861) | 0.1728(+0.0960) | 0.0432(+0.0008) |

Table 6. Results of PNN [7]. Rows correspond to training satellites, and columns correspond to testing satellites. Green indicates performance improvement, while red indicates performance degradation. The values in parentheses represent the average delta compared to the baseline without UniPAN.

| QNR↑                   | $\rho_t = \mathcal{N}(0, 1)$ |                 |                 |                 |                 |                 | $\rho_t = \mathcal{U}(0, 1)$ |                 |                 |                 |                 |                 |
|------------------------|------------------------------|-----------------|-----------------|-----------------|-----------------|-----------------|------------------------------|-----------------|-----------------|-----------------|-----------------|-----------------|
|                        | GF1                          | IK              | QB              | WV2             | WV3             | WV4             | GF1                          | IK              | QB              | WV2             | WV3             | WV4             |
| GF1                    | 0.9892(+0.0067)              | 0.9363(+0.0193) | 0.9705(+0.0098) | 0.9884(+0.0103) | 0.9803(+0.0029) | 0.9889(+0.0057) | 0.9919(+0.0094)              | 0.9966(+0.0410) | 0.9971(+0.0365) | 0.9944(+0.0163) | 0.9947(+0.0173) | 0.9955(+0.0123) |
| IK                     | 0.9919(+0.0433)              | 0.9966(+0.1332) | 0.9971(+0.1070) | 0.9944(+0.0520) | 0.9948(+0.0845) | 0.9956(+0.0234) | 0.9919(+0.0433)              | 0.9965(+0.1332) | 0.9971(+0.1070) | 0.9943(+0.0519) | 0.9947(+0.0844) | 0.9955(+0.0233) |
| QB                     | 0.9919(+0.0754)              | 0.9966(+0.0723) | 0.9971(+0.1355) | 0.9943(+0.0791) | 0.9947(+0.0637) | 0.9956(+0.0388) | 0.9637(+0.0471)              | 0.9966(+0.0722) | 0.9971(+0.1355) | 0.9587(+0.0435) | 0.9896(+0.0585) | 0.9955(+0.0388) |
| WV2                    | 0.9919(+0.0848)              | 0.9966(+0.1599) | 0.9971(+0.2057) | 0.9944(+0.0538) | 0.9947(+0.0829) | 0.9955(+0.0428) | 0.8740(+0.0332)              | 0.8434(+0.0067) | 0.7725(+0.0189) | 0.9456(+0.0050) | 0.9108(+0.0011) | 0.9387(+0.0140) |
| WV3                    | 0.9919(+0.0817)              | 0.9966(+0.2012) | 0.9971(+0.2348) | 0.9944(+0.0569) | 0.9947(+0.0828) | 0.9955(+0.0384) | 0.9919(+0.0816)              | 0.9965(+0.2012) | 0.9971(+0.2348) | 0.9942(+0.0567) | 0.9946(+0.0827) | 0.9954(+0.0383) |
| WV4                    | 0.9919(+0.0370)              | 0.9966(+0.1133) | 0.9971(+0.0896) | 0.9944(+0.0407) | 0.9947(+0.0623) | 0.9956(+0.0245) | 0.9919(+0.0370)              | 0.9966(+0.1133) | 0.9971(+0.0896) | 0.9944(+0.0407) | 0.9947(+0.0623) | 0.9956(+0.0245) |
| $D_\lambda \downarrow$ | $\rho_t = \mathcal{N}(0, 1)$ |                 |                 |                 |                 |                 | $\rho_t = \mathcal{U}(0, 1)$ |                 |                 |                 |                 |                 |
|                        | GF1                          | IK              | QB              | WV2             | WV3             | WV4             | GF1                          | IK              | QB              | WV2             | WV3             | WV4             |
| GF1                    | 0.0040(+0.0050)              | 0.0309(+0.0120) | 0.0044(+0.0009) | 0.0045(+0.0034) | 0.0048(+0.0004) | 0.0036(+0.0014) | 0.0014(+0.0077)              | 0.0011(+0.0178) | 0.0010(+0.0042) | 0.0027(+0.0052) | 0.0029(+0.0015) | 0.0025(+0.0025) |
| IK                     | 0.0013(+0.0079)              | 0.0010(+0.0411) | 0.0010(+0.0197) | 0.0026(+0.0108) | 0.0028(+0.0123) | 0.0025(+0.0042) | 0.0013(+0.0079)              | 0.0011(+0.0411) | 0.0011(+0.0196) | 0.0027(+0.0107) | 0.0029(+0.0122) | 0.0025(+0.0042) |
| QB                     | 0.0013(+0.0257)              | 0.0010(+0.0114) | 0.0010(+0.0272) | 0.0028(+0.0296) | 0.0029(+0.0078) | 0.0025(+0.0104) | 0.0153(+0.0117)              | 0.0011(+0.0113) | 0.0010(+0.0272) | 0.0131(+0.0192) | 0.0043(+0.0065) | 0.0025(+0.0104) |
| WV2                    | 0.0014(+0.0286)              | 0.0010(+0.0472) | 0.0010(+0.0457) | 0.0027(+0.0056) | 0.0029(+0.0078) | 0.0025(+0.0085) | 0.0415(+0.0115)              | 0.0494(+0.0012) | 0.0691(+0.0224) | 0.0083(+0.0000) | 0.0166(+0.0059) | 0.0219(+0.0109) |
| WV3                    | 0.0013(+0.0192)              | 0.0011(+0.0597) | 0.0010(+0.0524) | 0.0027(+0.0118) | 0.0029(+0.0084) | 0.0025(+0.0073) | 0.0014(+0.0192)              | 0.0011(+0.0596) | 0.0011(+0.0524) | 0.0028(+0.0116) | 0.0030(+0.0083) | 0.0026(+0.0072) |
| WV4                    | 0.0013(+0.0095)              | 0.0010(+0.0271) | 0.0010(+0.0152) | 0.0027(+0.0037) | 0.0029(+0.0035) | 0.0025(+0.0026) | 0.0013(+0.0095)              | 0.0010(+0.0271) | 0.0010(+0.0152) | 0.0027(+0.0037) | 0.0029(+0.0035) | 0.0025(+0.0026) |
| $D_S \downarrow$       | $\rho_t = \mathcal{N}(0, 1)$ |                 |                 |                 |                 |                 | $\rho_t = \mathcal{U}(0, 1)$ |                 |                 |                 |                 |                 |
|                        | GF1                          | IK              | QB              | WV2             | WV3             | WV4             | GF1                          | IK              | QB              | WV2             | WV3             | WV4             |
| GF1                    | 0.0068(+0.0018)              | 0.0346(+0.0085) | 0.0253(+0.0090) | 0.0071(+0.0071) | 0.0150(+0.0033) | 0.0075(+0.0043) | 0.0067(+0.0019)              | 0.0024(+0.0237) | 0.0018(+0.0325) | 0.0029(+0.0112) | 0.0024(+0.0159) | 0.0019(+0.0099) |
| IK                     | 0.0067(+0.0361)              | 0.0024(+0.0965) | 0.0018(+0.0899) | 0.0030(+0.0420) | 0.0024(+0.0735) | 0.0019(+0.0193) | 0.0067(+0.0361)              | 0.0024(+0.0965) | 0.0018(+0.0899) | 0.0030(+0.0421) | 0.0024(+0.0736) | 0.0019(+0.0193) |
| QB                     | 0.0067(+0.0560)              | 0.0024(+0.0620) | 0.0018(+0.1121) | 0.0029(+0.0521) | 0.0024(+0.0565) | 0.0019(+0.0288) | 0.0233(+0.0384)              | 0.0024(+0.0620) | 0.0018(+0.1121) | 0.0032(+0.0239) | 0.0062(+0.0527) | 0.0019(+0.0288) |
| WV2                    | 0.0067(+0.0588)              | 0.0024(+0.1216) | 0.0018(+0.1694) | 0.0029(+0.0486) | 0.0024(+0.0760) | 0.0019(+0.0349) | 0.0899(+0.0244)              | 0.1165(+0.0074) | 0.1731(+0.0018) | 0.0466(+0.0050) | 0.0741(+0.0044) | 0.0405(+0.0036) |
| WV3                    | 0.0067(+0.0640)              | 0.0024(+0.1546) | 0.0018(+0.1943) | 0.0030(+0.0460) | 0.0024(+0.0755) | 0.0019(+0.0314) | 0.0067(+0.0641)              | 0.0024(+0.1546) | 0.0018(+0.1943) | 0.0030(+0.0460) | 0.0024(+0.0755) | 0.0020(+0.0314) |
| WV4                    | 0.0067(+0.0280)              | 0.0024(+0.0898) | 0.0018(+0.0761) | 0.0029(+0.0373) | 0.0024(+0.0592) | 0.0019(+0.0220) | 0.0067(+0.0280)              | 0.0024(+0.0898) | 0.0018(+0.0761) | 0.0029(+0.0373) | 0.0024(+0.0592) | 0.0019(+0.0220) |
| $D_p \downarrow$       | $\rho_t = \mathcal{N}(0, 1)$ |                 |                 |                 |                 |                 | $\rho_t = \mathcal{U}(0, 1)$ |                 |                 |                 |                 |                 |
|                        | GF1                          | IK              | QB              | WV2             | WV3             | WV4             | GF1                          | IK              | QB              | WV2             | WV3             | WV4             |
| GF1                    | 0.0316(+0.0104)              | 0.2042(+0.0912) | 0.0302(+0.0083) | 0.0485(+0.0027) | 0.0428(+0.0048) | 0.0239(+0.0082) | 0.0000(+0.0420)              | 0.0000(+0.1129) | 0.0000(+0.0385) | 0.0001(+0.0457) | 0.0001(+0.0475) | 0.0             |



Table 7. Results of PreMix [1]. Rows correspond to training satellites, and columns correspond to testing satellites. **Green** indicates performance improvement, while **red** indicates performance degradation. The values in parentheses represent the average delta compared to the baseline without UniPAN.

| QNR↑                   | $\rho_t = \mathcal{N}(0, 1)$ |                 |                 |                 |                 |                 | $\rho_t = \mathcal{U}(0, 1)$ |                 |                 |                 |                 |                 |
|------------------------|------------------------------|-----------------|-----------------|-----------------|-----------------|-----------------|------------------------------|-----------------|-----------------|-----------------|-----------------|-----------------|
|                        | GF1                          | IK              | QB              | WV2             | WV3             | WV4             | GF1                          | IK              | QB              | WV2             | WV3             | WV4             |
| GF1                    | 0.9748(-0.0197)              | 0.9543(-0.0238) | 0.9612(-0.0217) | 0.9774(-0.0128) | 0.9701(-0.0174) | 0.9749(-0.0146) | 0.9793(-0.0151)              | 0.9494(-0.0287) | 0.9856(+0.0027) | 0.9800(-0.0102) | 0.9765(-0.0110) | 0.9875(-0.0020) |
| IK                     | 0.9430(-0.0028)              | 0.9028(-0.0011) | 0.9174(+0.0045) | 0.9342(+0.0179) | 0.9196(+0.0318) | 0.9685(+0.0049) | 0.9545(+0.0087)              | 0.9300(+0.0261) | 0.9458(+0.0329) | 0.9593(+0.0430) | 0.9416(+0.0538) | 0.9806(+0.0170) |
| QB                     | 0.9541(-0.0079)              | 0.9467(+0.0104) | 0.9243(+0.0017) | 0.9525(+0.0029) | 0.9432(+0.0128) | 0.9772(+0.0067) | 0.9690(+0.0070)              | 0.9430(+0.0067) | 0.9667(+0.0441) | 0.9761(+0.0265) | 0.9676(+0.0373) | 0.9845(+0.0139) |
| WV2                    | 0.8766(-0.0233)              | 0.7819(-0.0573) | 0.8064(-0.0471) | 0.9260(-0.0127) | 0.8860(-0.0223) | 0.9380(-0.0250) | 0.9113(+0.0114)              | 0.8222(-0.0171) | 0.8674(+0.0139) | 0.9381(-0.0006) | 0.9051(-0.0032) | 0.9587(-0.0043) |
| WV3                    | 0.8340(-0.0766)              | 0.7599(-0.0603) | 0.7818(-0.0243) | 0.9392(+0.0126) | 0.9112(+0.0085) | 0.9529(+0.0074) | 0.8983(-0.0123)              | 0.7783(-0.0420) | 0.8383(+0.0323) | 0.9349(+0.0083) | 0.9114(+0.0088) | 0.9485(+0.0030) |
| WV4                    | 0.9239(-0.0135)              | 0.8892(+0.0086) | 0.8897(+0.0071) | 0.9350(-0.0148) | 0.9049(-0.0218) | 0.9626(-0.0086) | 0.9440(+0.0066)              | 0.8909(+0.0104) | 0.8819(-0.0008) | 0.9596(+0.0098) | 0.9394(+0.0126) | 0.9714(+0.0002) |
| $D_\lambda \downarrow$ | $\rho_t = \mathcal{N}(0, 1)$ |                 |                 |                 |                 |                 | $\rho_t = \mathcal{U}(0, 1)$ |                 |                 |                 |                 |                 |
|                        | GF1                          | IK              | QB              | WV2             | WV3             | WV4             | GF1                          | IK              | QB              | WV2             | WV3             | WV4             |
| GF1                    | 0.0106(+0.0081)              | 0.0209(+0.0170) | 0.0093(+0.0068) | 0.0112(+0.0082) | 0.0123(+0.0090) | 0.0107(+0.0080) | 0.0049(+0.0024)              | 0.0118(+0.0078) | 0.0040(+0.0015) | 0.0043(+0.0012) | 0.0043(+0.0010) | 0.0036(+0.0009) |
| IK                     | 0.0134(+0.0010)              | 0.0223(+0.0031) | 0.0172(-0.0026) | 0.0241(-0.0027) | 0.0184(-0.0112) | 0.0095(-0.0018) | 0.0083(-0.0041)              | 0.0107(-0.0085) | 0.0114(-0.0084) | 0.0070(-0.0198) | 0.0066(-0.0229) | 0.0044(-0.0069) |
| QB                     | 0.0153(+0.0064)              | 0.0113(+0.0001) | 0.0174(+0.0011) | 0.0181(+0.0055) | 0.0129(-0.0007) | 0.0088(+0.0011) | 0.0076(-0.0013)              | 0.0090(-0.0021) | 0.0046(-0.0117) | 0.0037(-0.0088) | 0.0038(-0.0099) | 0.0030(-0.0046) |
| WV2                    | 0.0441(+0.0131)              | 0.0751(+0.0279) | 0.0484(+0.0251) | 0.0154(+0.0068) | 0.0255(+0.0123) | 0.0184(+0.0102) | 0.0295(-0.0015)              | 0.0588(+0.0116) | 0.0310(+0.0078) | 0.0106(+0.0019) | 0.0187(+0.0056) | 0.0108(+0.0026) |
| WV3                    | 0.0572(+0.0288)              | 0.0845(+0.0246) | 0.0497(-0.0051) | 0.0149(-0.0025) | 0.0148(-0.0034) | 0.0109(-0.0055) | 0.0427(+0.0144)              | 0.1004(+0.0406) | 0.0444(-0.0104) | 0.0165(-0.0009) | 0.0180(-0.0003) | 0.0178(+0.0013) |
| WV4                    | 0.0318(+0.0140)              | 0.0377(+0.0058) | 0.0241(-0.0034) | 0.0295(+0.0209) | 0.0395(+0.0288) | 0.0121(+0.0061) | 0.0150(-0.0028)              | 0.0280(-0.0040) | 0.0296(+0.0021) | 0.0055(-0.0032) | 0.0072(-0.0035) | 0.0053(-0.0007) |
| $D_S \downarrow$       | $\rho_t = \mathcal{N}(0, 1)$ |                 |                 |                 |                 |                 | $\rho_t = \mathcal{U}(0, 1)$ |                 |                 |                 |                 |                 |
|                        | GF1                          | IK              | QB              | WV2             | WV3             | WV4             | GF1                          | IK              | QB              | WV2             | WV3             | WV4             |
| GF1                    | 0.0148(+0.0117)              | 0.0254(+0.0075) | 0.0298(+0.0152) | 0.0116(+0.0048) | 0.0178(+0.0086) | 0.0146(+0.0068) | 0.0159(+0.0128)              | 0.0393(+0.0213) | 0.0104(-0.0042) | 0.0158(+0.0090) | 0.0193(+0.0101) | 0.0089(+0.0012) |
| IK                     | 0.0445(+0.0018)              | 0.0771(-0.0027) | 0.0670(-0.0022) | 0.0432(-0.0155) | 0.0631(-0.0226) | 0.0222(-0.0032) | 0.0377(-0.0051)              | 0.0603(-0.0195) | 0.0434(-0.0258) | 0.0339(-0.0248) | 0.0523(-0.0334) | 0.0151(-0.0104) |
| QB                     | 0.0312(+0.0016)              | 0.0427(-0.0019) | 0.0595(-0.0029) | 0.0303(-0.0081) | 0.0446(-0.0123) | 0.0142(-0.0078) | 0.0237(-0.0058)              | 0.0486(-0.0049) | 0.0290(-0.0335) | 0.0202(-0.0182) | 0.0287(-0.0281) | 0.0125(-0.0095) |
| WV2                    | 0.0836(+0.0118)              | 0.1568(+0.0351) | 0.1543(+0.0274) | 0.0595(+0.0064) | 0.0911(+0.0113) | 0.0447(+0.0155) | 0.0615(-0.0103)              | 0.1294(+0.0078) | 0.1056(-0.0212) | 0.0519(-0.0013) | 0.0779(-0.0019) | 0.0309(+0.0017) |
| WV3                    | 0.1181(+0.0549)              | 0.1721(+0.0432) | 0.1786(+0.0296) | 0.0468(-0.0103) | 0.0753(+0.0041) | 0.0368(-0.0023) | 0.0625(-0.0007)              | 0.1374(+0.0085) | 0.1240(-0.0250) | 0.0496(-0.0075) | 0.0722(-0.0085) | 0.0347(-0.0043) |
| WV4                    | 0.0464(+0.0005)              | 0.0771(-0.0144) | 0.0888(-0.0043) | 0.0375(-0.0045) | 0.0587(-0.0046) | 0.0256(+0.0026) | 0.0419(-0.0039)              | 0.0844(-0.0071) | 0.0920(-0.0012) | 0.0352(-0.0068) | 0.0538(-0.0095) | 0.0235(+0.0005) |
| $D_P \downarrow$       | $\rho_t = \mathcal{N}(0, 1)$ |                 |                 |                 |                 |                 | $\rho_t = \mathcal{U}(0, 1)$ |                 |                 |                 |                 |                 |
|                        | GF1                          | IK              | QB              | WV2             | WV3             | WV4             | GF1                          | IK              | QB              | WV2             | WV3             | WV4             |
| GF1                    | 0.0432(+0.0298)              | 0.1033(+0.0692) | 0.0299(+0.0116) | 0.0860(+0.0748) | 0.0761(+0.0611) | 0.0457(+0.0273) | 0.0261(+0.0127)              | 0.0849(+0.0507) | 0.0201(+0.0018) | 0.0123(+0.0011) | 0.0155(+0.0005) | 0.0230(+0.0046) |
| IK                     | 0.0800(+0.0058)              | 0.0878(-0.0239) | 0.0821(-0.0173) | 0.1505(+0.0869) | 0.1444(+0.0395) | 0.0598(+0.0171) | 0.0574(-0.0168)              | 0.0718(-0.0399) | 0.0455(-0.0540) | 0.0327(-0.0309) | 0.0526(-0.0523) | 0.0277(-0.0150) |
| QB                     | 0.0703(+0.0326)              | 0.0540(+0.0004) | 0.0891(+0.0240) | 0.0420(+0.0083) | 0.0451(-0.0077) | 0.0360(+0.0075) | 0.0344(-0.0033)              | 0.0493(-0.0043) | 0.0337(-0.0314) | 0.0122(-0.0215) | 0.0150(-0.0378) | 0.0189(-0.0095) |
| WV2                    | 0.1819(+0.0013)              | 0.2342(+0.0088) | 0.2347(+0.0309) | 0.1133(+0.0113) | 0.1509(+0.0338) | 0.1043(+0.0038) | 0.1540(-0.0266)              | 0.2096(-0.0159) | 0.1711(-0.0327) | 0.0873(-0.0148) | 0.1257(-0.0213) | 0.0851(-0.0154) |
| WV3                    | 0.2748(+0.0897)              | 0.2619(-0.0454) | 0.2757(-0.0223) | 0.1583(+0.0407) | 0.1813(+0.0406) | 0.1198(-0.0439) | 0.2518(+0.0666)              | 0.3855(+0.0781) | 0.2883(-0.0097) | 0.1215(+0.0039) | 0.0772(-0.0080) | 0.2012(+0.0376) |
| WV4                    | 0.1343(+0.0526)              | 0.1312(+0.0106) | 0.1215(+0.0055) | 0.1891(+0.1421) | 0.2213(+0.1411) | 0.0577(+0.0235) | 0.0846(+0.0029)              | 0.1423(+0.0217) | 0.1679(+0.0519) | 0.0461(-0.0009) | 0.0608(-0.0195) | 0.0478(+0.0136) |

Table 8. Results of FeINFN [6]. Rows correspond to training satellites, and columns correspond to testing satellites. **Green** indicates performance improvement, while **red** indicates performance degradation. The values in parentheses represent the average delta compared to the baseline without UniPAN.

| QNR↑                   | $\rho_t = \mathcal{N}(0, 1)$ |                 |                 |                 |                 |                 | $\rho_t = \mathcal{U}(0, 1)$ |                 |                 |                 |                 |                 |
|------------------------|------------------------------|-----------------|-----------------|-----------------|-----------------|-----------------|------------------------------|-----------------|-----------------|-----------------|-----------------|-----------------|
|                        | GF1                          | IK              | QB              | WV2             | WV3             | WV4             | GF1                          | IK              | QB              | WV2             | WV3             | WV4             |
| GF1                    | 0.9800(+0.0076)              | 0.9440(-0.0067) | 0.9755(+0.0162) | 0.9767(+0.0049) | 0.9750(+0.0248) | 0.9838(-0.0020) | 0.9863(+0.0140)              | 0.9404(-0.0102) | 0.9654(+0.0060) | 0.9795(+0.0077) | 0.9743(+0.0242) | 0.9890(+0.0032) |
| IK                     | 0.9531(+0.0048)              | 0.9106(+0.0294) | 0.9145(+0.0389) | 0.9031(+0.0136) | 0.9215(+0.0408) | 0.9699(+0.0336) | 0.9558(+0.0074)              | 0.9110(+0.0297) | 0.9309(+0.0553) | 0.9520(+0.0626) | 0.9426(+0.0619) | 0.9777(+0.0414) |
| QB                     | 0.9445(-0.0153)              | 0.9328(+0.0087) | 0.9298(+0.0364) | 0.9701(+0.0233) | 0.9549(+0.0277) | 0.9791(+0.0102) | 0.9627(+0.0028)              | 0.9388(+0.0147) | 0.9655(+0.0722) | 0.9762(+0.0295) | 0.9716(+0.0444) | 0.9768(+0.0079) |
| WV2                    | 0.8897(+0.0015)              | 0.7942(-0.0145) | 0.8429(+0.0370) | 0.9430(-0.0024) | 0.9078(+0.0040) | 0.9556(+0.0112) | 0.8337(-0.0544)              | 0.7355(-0.0732) | 0.8072(+0.0013) | 0.9491(+0.0037) | 0.9201(+0.0163) | 0.9506(+0.0062) |
| WV3                    | 0.8386(-0.0504)              | 0.7867(+0.0084) | 0.7819(+0.0153) | 0.8894(-0.0550) | 0.9101(+0.0017) | 0.9424(-0.0153) | 0.8215(-0.0675)              | 0.8065(+0.0282) | 0.8351(+0.0685) | 0.9368(-0.0077) | 0.9163(+0.0080) | 0.9464(-0.0113) |
| WV4                    | 0.9370(+0.0205)              | 0.8971(+0.0501) | 0.8694(+0.0100) | 0.9607(+0.0105) | 0.9395(+0.0156) | 0.9730(+0.0072) | 0.9549(+0.0384)              | 0.8968(+0.0498) | 0.9347(+0.0753) | 0.9679(+0.0178) | 0.9518(+0.0278) | 0.9759(+0.0101) |
| $D_\lambda \downarrow$ | $\rho_t = \mathcal{N}(0, 1)$ |                 |                 |                 |                 |                 | $\rho_t = \mathcal{U}(0, 1)$ |                 |                 |                 |                 |                 |
|                        | GF1                          | IK              | QB              | WV2             | WV3             | WV4             | GF1                          | IK              | QB              | WV2             | WV3             | WV4             |
| GF1                    | 0.0095(+0.0033)              | 0.0263(+0.0127) | 0.0033(-0.0018) | 0.0133(+0.0065) | 0.0095(+0.0023) | 0.0065(+0.0020) | 0.0042(-0.0021)              | 0.0208(+0.0071) | 0.0050(-0.0000) | 0.0042(-0.0026) | 0.0038(-0.0034) | 0.0035(-0.0010) |
| IK                     | 0.0083(-0.0007)              | 0.0158(-0.0112) | 0.0157(-0.0173) | 0.0481(+0.0076) | 0.0165(-0.0139) | 0.0096(-0.0130) | 0.0074(-0.0015)              | 0.0181(-0.0089) | 0.0155(-0.0176) | 0.0087(-0.0317) | 0.0070(-0.0234) | 0.0062(-0.0164) |
| QB                     | 0.0196(+0.0116)              | 0.0102(-0.0024) | 0.0116(-0.0041) | 0.0033(-0.0113) | 0.0039(-0.0074) | 0.0043(-0.0027) | 0.0101(+0.0021)              | 0.0082(-0.0044) | 0.0049(-0.0108) | 0.0055(-0.0092) | 0.0045(-0.0069) | 0.0056(-0.0014) |
| WV2                    | 0.0366(+0.0016)              | 0.0674(+0.0081) | 0.0288(-0.0169) | 0.0076(+0.0035) | 0.0137(+0.0023) | 0.0100(-0.0055) | 0.0620(+0.0270)              | 0.0983(+0.0391) | 0.0508(+0.0051) | 0.0053(+0.0013) | 0.0098(-0.0016) | 0.0132(-0.0023) |
| WV3                    | 0.0590(+0.0298)              | 0.0747(+0.0017) | 0.0465(-0.0097) | 0.0464(+0.0381) | 0.0138(+0.0005) | 0.0179(+0.0083) | 0.0584(+0.0291)              | 0.0618(-0.0112) | 0.0344(-0.0218) | 0.0156(+0.0073) | 0.0108(-0.0025) | 0.0141(+0.0044) |
| WV4                    | 0.0174(-0.0048)              | 0.0297(-0.0112) | 0.0288(-0.0012) | 0.0089(+0.0017) | 0.0106(+0.0021) | 0.0044(-0.0015) | 0.0100(-0.0122)              | 0.0273(-0.0135) | 0.0081(-0.0219) | 0.0057(-0.0015) | 0.0068(-0.0017) | 0.0042(-0.0018) |
| $D_S \downarrow$       | $\rho_t = \mathcal{N}(0, 1)$ |                 |                 |                 |                 |                 | $\rho_t = \mathcal{U}(0, 1)$ |                 |                 |                 |                 |                 |
|                        | GF1                          | IK              | QB              | WV2             | WV3             | WV4             | GF1                          | IK              | QB              | WV2             | WV3             | WV4             |
| GF1                    | 0.0109(-0.0107)              | 0.0312(-0.0051) | 0.0213(-0.0146) | 0.0103(-0.0113) | 0.0157(-0.0274) | 0.0098(-0.0000) | 0.0095(-0.0121)              | 0.0397(+0.0035) | 0.0298(-0.0060) | 0.0164(-0.0052) | 0.0220(-0.0211) | 0.0076(-0.0022) |
| IK                     | 0.0391(-0.0042)              | 0.0757(-0.0193) | 0.0713(-0.0238) | 0.0557(-0.0190) | 0.0630(-0.0290) | 0.0207(-0.0215) | 0.0372(-0.0061)              | 0.0730(-0.0220) | 0.0548(-0.0403) | 0.0396(-0.0350) | 0.0508(-0.0413) | 0.0162(-0.0260) |
| QB                     | 0.0368(+0.0043)              | 0.0580(-0.0067) | 0.0594(-0.0334) | 0.0267(-0.0127) | 0.0414(-0.0209) | 0.0167(-0.0076) | 0.0276(-0.0049)              | 0.0536(-0.0110) | 0.0299(-0.0629) | 0.0185(-0.0209) | 0.0241(-0.0383) | 0.0177(-0.0065) |
| WV2                    | 0.0773(-0.0033)              | 0.1509(+0.0079) | 0.1331(-0.0240) | 0.0498(-0.0009) | 0.0798(-0.0061) | 0.0348(-0.0060) | 0.1126(+0.0320)              | 0.1854(+0.0424) | 0.1505(-0.0066) | 0.0458(-0.0049) | 0.0709(-0.0150) | 0.0368(-0.0040) |
| WV3                    | 0.1114(+0.0265)              | 0.1519(+0.0108) | 0.1810(-0.0083) | 0.0675(+0.0199) | 0.0774(-0.0022) | 0.0406(+0.0075) | 0.1409(+0.0560)              | 0.1432(-0.0195) | 0.1360(-0.0532) | 0.0483(+0.0007) | 0.0739(+0.0057) | 0.0403(+0.0072) |
| WV4                    | 0.0466(-0.0164)              | 0.0761(-0.0417) | 0.1054(-0.0093) | 0.0308(-0.0123) | 0.0505(-0.0178) | 0.0227(-0.0058) | 0.0356(-0.0273)              | 0.0792(-0.0386) | 0.0579(-0.0568) | 0.0265(-0.0166) | 0.0418(-0.0265) | 0.0200(-0.0084) |
| $D_P \downarrow$       | $\rho_t = \mathcal{N}(0, 1)$ |                 |                 |                 |                 |                 | $\rho_t = \mathcal{U}(0, 1)$ |                 |                 |                 |                 |                 |
|                        | GF1                          | IK              | QB              | WV2             | WV3             | WV4             | GF1                          | IK              | QB              | WV2             | WV3             | WV4             |
| GF1                    | 0.0507(+0.0188)              | 0.1702(+0.1174) | 0.0276(-0.0117) | 0.0447(+0.0177) | 0.0558(+0.0181) | 0.0223(+0.0059) | 0.0247(-0.0073)              | 0.1106(+0.0579) | 0.0343(-0.0049) | 0.0144(-0.0126) | 0.0202(-0.0175) | 0.0145(-0.0019) |
| IK                     | 0.0795(-0.0002)              | 0.1001(-0.0093) | 0.0952(-0.0495) | 0.1350(+0.0490) | 0.0619(-0.0562) | 0.0383(-0.0267) | 0.0687(-0.0110)              | 0.1012(-0.0082) | 0.0813(-0.0633) | 0.0555(-0.0305) | 0.0669(-0.0512) | 0.0413(-0.0237) |
| QB                     | 0.0711(+0.0121)              | 0.0631(-0.0081) | 0.0845(+0.0269) | 0.0252(-0.0327) | 0.0425(-0.0255) | 0.0270(-0.0203) | 0.0401(-0.0189)              | 0.0586(-0.0126) | 0.0441(-0.0673) | 0.0142(-0.0430) | 0.0166(-0.0514) | 0.0254(-0.0220) |
| WV2                    | 0.1876(+0.0134)              | 0.2459(+0.0385) | 0.2219(+0.0094) | 0.1322(+0.0144) | 0.1417(-0.0202) | 0.1098(-0.0147) | 0.2001(+0.0259)              | 0.2576(+0.0441) | 0.2562(+0.0437) | 0.0987(-0.0196) | 0.1106(+0.0512) | 0.0929(+0.0349) |
| WV3                    | 0.2156(+0.0402)              | 0.2287(-0.0264) | 0.2605(+0.0012) | 0.2684(+0.1709) | 0.1437(-0.0051) | 0.0937(-0.0014) | 0.2726(+0.0972)              | 0.2162(-0.0389) | 0.2126(-0.0481) | 0.0845(-0.0129) | 0.1329(-0.0158) | 0.0924(-0.0078) |
| WV4                    | 0.0886(-0.0211)              | 0.0880(-0.0593) | 0.1400(-0.0190) | 0.0717(+0.0221) | 0.1747(+0.0885) | 0.3666(-0.0114) | 0.0652(-0.0454)              | 0.1113(-0.0560) | 0.0706(-0.0884) | 0.0313(-0.0182) | 0.0535(-0.0352) | 0.0306(-0.0174) |

Table 9. Results of LAGConv [5]. Rows correspond to training satellites, and columns correspond to testing satellites. Green indicates performance improvement, while red indicates performance degradation. The values in parentheses represent the average delta compared to the baseline without UniPAN.

| QNR↑                   | $\rho_t = \mathcal{N}(0, 1)$ |                 |                 |                 |                 |                 | $\rho_t = \mathcal{U}(0, 1)$ |                 |                 |                 |                 |                 |
|------------------------|------------------------------|-----------------|-----------------|-----------------|-----------------|-----------------|------------------------------|-----------------|-----------------|-----------------|-----------------|-----------------|
|                        | GF1                          | IK              | QB              | WV2             | WV3             | WV4             | GF1                          | IK              | QB              | WV2             | WV3             | WV4             |
| GF1                    | 0.9696(+0.0254)              | 0.8753(+0.0896) | 0.9682(+0.0015) | 0.8314(+0.0882) | 0.8725(+0.0884) | 0.9058(+0.0009) | 0.9774(+0.0331)              | 0.9496(+0.0152) | 0.9641(+0.0057) | 0.9835(+0.0638) | 0.9791(+0.0182) | 0.9817(+0.0769) |
| IK                     | 0.9464(+0.0029)              | 0.9117(+0.0375) | 0.8895(+0.0215) | 0.8710(+0.0469) | 0.8566(+0.0289) | 0.9097(+0.0362) | 0.9530(+0.0037)              | 0.9364(+0.0621) | 0.9288(+0.0608) | 0.9279(+0.0100) | 0.9348(+0.0492) | 0.9505(+0.0046) |
| QB                     | 0.9276(+0.0326)              | 0.9276(+0.0061) | 0.9106(+0.0266) | 0.8652(+0.0762) | 0.8567(+0.0634) | 0.9331(+0.0064) | 0.9666(+0.0065)              | 0.9345(+0.0131) | 0.9686(+0.0847) | 0.9756(+0.0341) | 0.9713(+0.0512) | 0.9797(+0.0403) |
| WV2                    | 0.8319(+0.0649)              | 0.7359(+0.0248) | 0.7936(+0.1750) | 0.9467(+0.0031) | 0.9081(+0.0087) | 0.9511(+0.0399) | 0.8185(+0.0515)              | 0.6520(+0.0591) | 0.7763(+0.1577) | 0.9351(+0.0085) | 0.9019(+0.0025) | 0.9245(+0.0132) |
| WV3                    | 0.8086(+0.0271)              | 0.7489(+0.0031) | 0.6924(+0.0700) | 0.8982(+0.0434) | 0.9159(+0.0005) | 0.9385(+0.0070) | 0.8358(+0.0000)              | 0.7331(+0.0188) | 0.6923(+0.0699) | 0.9405(+0.0011) | 0.9204(+0.0050) | 0.9292(+0.0163) |
| WV4                    | 0.9279(+0.0062)              | 0.9002(+0.0365) | 0.8776(+0.0212) | 0.9278(+0.0259) | 0.9287(+0.0012) | 0.9709(+0.0023) | 0.9238(+0.0021)              | 0.8715(+0.0077) | 0.9030(+0.0466) | 0.9583(+0.0046) | 0.9457(+0.0158) | 0.9707(+0.0020) |
| $D_\lambda \downarrow$ | $\rho_t = \mathcal{N}(0, 1)$ |                 |                 |                 |                 |                 | $\rho_t = \mathcal{U}(0, 1)$ |                 |                 |                 |                 |                 |
|                        | GF1                          | IK              | QB              | WV2             | WV3             | WV4             | GF1                          | IK              | QB              | WV2             | WV3             | WV4             |
| GF1                    | 0.0129(+0.0156)              | 0.0680(+0.0575) | 0.0085(+0.0000) | 0.0931(+0.0581) | 0.0757(+0.0571) | 0.0484(+0.0070) | 0.0081(+0.0204)              | 0.0208(+0.0103) | 0.0068(+0.0017) | 0.0059(+0.0291) | 0.0072(+0.0114) | 0.0084(+0.0330) |
| IK                     | 0.0114(+0.0018)              | 0.0225(+0.0124) | 0.0212(+0.0027) | 0.0603(+0.0325) | 0.0587(+0.0288) | 0.0380(+0.0185) | 0.0087(+0.0009)              | 0.0181(+0.0169) | 0.0157(+0.0081) | 0.0238(+0.0040) | 0.0512(+0.0147) | 0.0172(+0.0023) |
| QB                     | 0.0321(+0.0226)              | 0.0126(+0.0021) | 0.0246(+0.0063) | 0.0786(+0.0579) | 0.0774(+0.0551) | 0.0318(+0.0123) | 0.0093(+0.0002)              | 0.0098(+0.0048) | 0.0059(+0.0124) | 0.0049(+0.0158) | 0.0030(+0.0192) | 0.0058(+0.0137) |
| WV2                    | 0.0510(+0.0351)              | 0.0915(+0.0132) | 0.0376(+0.0773) | 0.0060(+0.0015) | 0.0138(+0.0031) | 0.0147(+0.0234) | 0.0807(+0.0054)              | 0.1599(+0.0551) | 0.0598(+0.0551) | 0.0129(+0.0054) | 0.0201(+0.0032) | 0.0338(+0.0043) |
| WV3                    | 0.0776(+0.0253)              | 0.0875(+0.0009) | 0.0755(+0.0435) | 0.0369(+0.0210) | 0.0141(+0.0015) | 0.0202(+0.0033) | 0.0585(+0.0062)              | 0.0987(+0.0121) | 0.0838(+0.0352) | 0.0161(+0.0002) | 0.0114(+0.0012) | 0.0252(+0.0084) |
| WV4                    | 0.0275(+0.0067)              | 0.0306(+0.0047) | 0.0235(+0.0069) | 0.0345(+0.0272) | 0.0159(+0.0068) | 0.0057(+0.0008) | 0.0270(+0.0062)              | 0.0550(+0.0198) | 0.0189(+0.0115) | 0.0095(+0.0023) | 0.0061(+0.0031) | 0.0061(+0.0004) |
| $D_S \downarrow$       | $\rho_t = \mathcal{N}(0, 1)$ |                 |                 |                 |                 |                 | $\rho_t = \mathcal{U}(0, 1)$ |                 |                 |                 |                 |                 |
|                        | GF1                          | IK              | QB              | WV2             | WV3             | WV4             | GF1                          | IK              | QB              | WV2             | WV3             | WV4             |
| GF1                    | 0.0180(+0.0137)              | 0.0635(+0.0384) | 0.0236(+0.0016) | 0.0959(+0.0481) | 0.0615(+0.0404) | 0.0520(+0.0060) | 0.0147(+0.0170)              | 0.0302(+0.0052) | 0.0295(+0.0074) | 0.0107(+0.0370) | 0.0138(+0.0073) | 0.0100(+0.0480) |
| IK                     | 0.0429(+0.0012)              | 0.0683(+0.0273) | 0.0920(+0.0197) | 0.0745(+0.0179) | 0.0938(+0.0063) | 0.0574(+0.0220) | 0.0389(+0.0028)              | 0.0465(+0.0491) | 0.0566(+0.0551) | 0.0503(+0.0063) | 0.0512(+0.0364) | 0.0333(+0.0021) |
| QB                     | 0.0468(+0.0161)              | 0.0610(+0.0044) | 0.0665(+0.0332) | 0.0756(+0.0366) | 0.0804(+0.0211) | 0.0392(+0.0030) | 0.0244(+0.0063)              | 0.0565(+0.0090) | 0.0258(+0.0740) | 0.0258(+0.0193) | 0.0258(+0.0335) | 0.0146(+0.0276) |
| WV2                    | 0.1251(+0.0402)              | 0.1916(+0.0170) | 0.1763(+0.1341) | 0.0476(+0.0017) | 0.0795(+0.0060) | 0.0349(+0.0188) | 0.1110(+0.0543)              | 0.2247(+0.0161) | 0.1761(+0.1343) | 0.0529(+0.0036) | 0.0800(+0.0055) | 0.0438(+0.0099) |
| WV3                    | 0.1270(+0.0054)              | 0.1814(+0.0473) | 0.2549(+0.0473) | 0.0686(+0.0254) | 0.0713(+0.0019) | 0.0425(+0.0041) | 0.1142(+0.0004)              | 0.1890(+0.0095) | 0.2473(+0.0550) | 0.0442(+0.0009) | 0.0692(+0.0040) | 0.0471(+0.0086) |
| WV4                    | 0.0460(+0.0130)              | 0.0718(+0.0340) | 0.1018(+0.0155) | 0.0397(+0.0002) | 0.0565(+0.0052) | 0.0235(+0.0016) | 0.0512(+0.0078)              | 0.0788(+0.0270) | 0.0803(+0.0370) | 0.0325(+0.0070) | 0.0486(+0.0130) | 0.0235(+0.0016) |
| $D_P \downarrow$       | $\rho_t = \mathcal{N}(0, 1)$ |                 |                 |                 |                 |                 | $\rho_t = \mathcal{U}(0, 1)$ |                 |                 |                 |                 |                 |
|                        | GF1                          | IK              | QB              | WV2             | WV3             | WV4             | GF1                          | IK              | QB              | WV2             | WV3             | WV4             |
| GF1                    | 0.0756(+0.0103)              | 0.1444(+0.0676) | 0.0518(+0.0051) | 0.1443(+0.0646) | 0.1170(+0.0412) | 0.0954(+0.0638) | 0.0431(+0.0428)              | 0.0857(+0.0089) | 0.0449(+0.0119) | 0.0314(+0.0483) | 0.0402(+0.0356) | 0.0366(+0.1226) |
| IK                     | 0.0924(+0.0109)              | 0.1238(+0.0019) | 0.1334(+0.0286) | 0.1900(+0.1010) | 0.1432(+0.0152) | 0.1204(+0.0536) | 0.0806(+0.0009)              | 0.0924(+0.0333) | 0.0953(+0.0667) | 0.0686(+0.0204) | 0.0825(+0.0454) | 0.0638(+0.0030) |
| QB                     | 0.0936(+0.0213)              | 0.0708(+0.0087) | 0.1098(+0.0330) | 0.1164(+0.0393) | 0.1598(+0.0737) | 0.0803(+0.0042) | 0.0478(+0.0245)              | 0.0713(+0.0082) | 0.0376(+0.1053) | 0.0210(+0.0560) | 0.0227(+0.0633) | 0.0311(+0.0450) |
| WV2                    | 0.2011(+0.0276)              | 0.2597(+0.0180) | 0.2854(+0.1088) | 0.1147(+0.0073) | 0.1527(+0.0506) | 0.1078(+0.0613) | 0.2283(+0.0004)              | 0.3039(+0.0261) | 0.2767(+0.1176) | 0.1078(+0.0142) | 0.1549(+0.0484) | 0.1499(+0.0192) |
| WV3                    | 0.2402(+0.0487)              | 0.2486(+0.0014) | 0.3384(+0.0253) | 0.3145(+0.2033) | 0.1773(+0.0180) | 0.1278(+0.0004) | 0.2181(+0.0267)              | 0.2460(+0.0040) | 0.3146(+0.0491) | 0.1374(+0.0262) | 0.1403(+0.0191) | 0.1247(+0.0027) |
| WV4                    | 0.1049(+0.0034)              | 0.1072(+0.0369) | 0.1218(+0.0363) | 0.1485(+0.0948) | 0.1476(+0.0645) | 0.0428(+0.0060) | 0.1138(+0.0123)              | 0.1531(+0.0090) | 0.1110(+0.0471) | 0.0459(+0.0078) | 0.0611(+0.0220) | 0.0454(+0.0034) |

Table 10. Results of SFIIN [13]. Rows correspond to training satellites, and columns correspond to testing satellites. Green indicates performance improvement, while red indicates performance degradation. The values in parentheses represent the average delta compared to the baseline without UniPAN.

| QNR↑                   | $\rho_t = \mathcal{N}(0, 1)$ |                 |                 |                 |                 |                 | $\rho_t = \mathcal{U}(0, 1)$ |                 |                 |                 |                 |                 |
|------------------------|------------------------------|-----------------|-----------------|-----------------|-----------------|-----------------|------------------------------|-----------------|-----------------|-----------------|-----------------|-----------------|
|                        | GF1                          | IK              | QB              | WV2             | WV3             | WV4             | GF1                          | IK              | QB              | WV2             | WV3             | WV4             |
| GF1                    | 0.9847(+0.0043)              | 0.9609(+0.0013) | 0.9673(+0.0127) | 0.9830(+0.0290) | 0.9743(+0.0002) | 0.9859(+0.0221) | 0.9869(+0.0066)              | 0.9683(+0.0061) | 0.9848(+0.0048) | 0.9855(+0.0316) | 0.9830(+0.0085) | 0.9836(+0.0198) |
| IK                     | 0.9441(+0.0007)              | 0.8960(+0.0396) | 0.8968(+0.0612) | 0.9301(+0.0511) | 0.9027(+0.0414) | 0.9514(+0.0413) | 0.9464(+0.0031)              | 0.8772(+0.0208) | 0.9179(+0.0824) | 0.9350(+0.0560) | 0.9194(+0.0581) | 0.9557(+0.0456) |
| QB                     | 0.9493(+0.0024)              | 0.9318(+0.0196) | 0.9257(+0.0744) | 0.9598(+0.0248) | 0.9443(+0.0256) | 0.9679(+0.0173) | 0.9656(+0.0139)              | 0.9470(+0.0349) | 0.9534(+0.1021) | 0.9686(+0.0337) | 0.9626(+0.0439) | 0.9818(+0.0312) |
| WV2                    | 0.7804(+0.0080)              | 0.7277(+0.0208) | 0.6871(+0.0504) | 0.9450(+0.0076) | 0.9069(+0.0131) | 0.9568(+0.0230) | 0.8507(+0.0624)              | 0.7574(+0.0504) | 0.7795(+0.0420) | 0.9339(+0.0034) | 0.9030(+0.0091) | 0.9363(+0.0025) |
| WV3                    | 0.7416(+0.0435)              | 0.6896(+0.0078) | 0.6147(+0.0268) | 0.9288(+0.0019) | 0.9082(+0.0060) | 0.9285(+0.0023) | 0.7950(+0.0098)              | 0.7571(+0.0754) | 0.6402(+0.0524) | 0.9404(+0.0135) | 0.9146(+0.0004) | 0.9434(+0.0171) |
| WV4                    | 0.8806(+0.0138)              | 0.8987(+0.0365) | 0.8163(+0.0979) | 0.9557(+0.0061) | 0.9387(+0.0036) | 0.9659(+0.0057) | 0.9260(+0.0591)              | 0.8607(+0.0014) | 0.8741(+0.1557) | 0.9566(+0.0070) | 0.9380(+0.0029) | 0.9691(+0.0088) |
| $D_\lambda \downarrow$ | $\rho_t = \mathcal{N}(0, 1)$ |                 |                 |                 |                 |                 | $\rho_t = \mathcal{U}(0, 1)$ |                 |                 |                 |                 |                 |
|                        | GF1                          | IK              | QB              | WV2             | WV3             | WV4             | GF1                          | IK              | QB              | WV2             | WV3             | WV4             |
| GF1                    | 0.0040(+0.0034)              | 0.0126(+0.0095) | 0.0058(+0.0009) | 0.0076(+0.0077) | 0.0068(+0.0055) | 0.0054(+0.0072) | 0.0054(+0.0020)              | 0.0155(+0.0066) | 0.0058(+0.0008) | 0.0075(+0.0079) | 0.0085(+0.0038) | 0.0086(+0.0040) |
| IK                     | 0.0099(+0.0004)              | 0.0243(+0.0122) | 0.0186(+0.0166) | 0.0183(+0.0231) | 0.0171(+0.0206) | 0.0151(+0.0201) | 0.0094(+0.0002)              | 0.0333(+0.0032) | 0.0185(+0.0167) | 0.0152(+0.0262) | 0.0126(+0.0251) | 0.0136(+0.0216) |
| QB                     | 0.0130(+0.0044)              | 0.0114(+0.0029) | 0.0130(+0.0185) | 0.0098(+0.0089) | 0.0097(+0.0001) | 0.0085(+0.0031) | 0.0088(+0.0001)              | 0.0099(+0.0044) | 0.0135(+0.0180) | 0.0070(+0.0117) | 0.0064(+0.0032) | 0.0065(+0.0052) |
| WV2                    | 0.0867(+0.0209)              | 0.1001(+0.0010) | 0.0852(+0.0088) | 0.0056(+0.0010) | 0.0120(+0.0006) | 0.0135(+0.0088) | 0.0535(+0.0123)              | 0.0852(+0.0158) | 0.0541(+0.0223) | 0.0123(+0.0057) | 0.0167(+0.0041) | 0.0238(+0.0015) |
| WV3                    | 0.0981(+0.0321)              | 0.1090(+0.0064) | 0.1167(+0.0043) | 0.0198(+0.0039) | 0.0114(+0.0018) | 0.0224(+0.0013) | 0.0695(+0.0036)              | 0.0783(+0.0370) | 0.1099(+0.0110) | 0.0089(+0.0070) | 0.0102(+0.0006) | 0.0147(+0.0063) |
| WV4                    | 0.0344(+0.0027)              | 0.0245(+0.0142) | 0.0409(+0.0333) | 0.0106(+0.0015) | 0.0115(+0.0028) | 0.0064(+0.0012) | 0.0183(+0.0188)              | 0.0343(+0.0044) | 0.0230(+0.0512) | 0.0042(+0.0078) | 0.0066(+0.0021) | 0.0050(+0.0025) |
| $D_S \downarrow$       | $\rho_t = \mathcal{N}(0, 1)$ |                 |                 |                 |                 |                 | $\rho_t = \mathcal{U}(0, 1)$ |                 |                 |                 |                 |                 |
|                        | GF1                          | IK              | QB              | WV2             | WV3             | WV4             | GF1                          | IK              | QB              | WV2             | WV3             | WV4             |
| GF1                    | 0.0114(+0.0011)              | 0.0268(+0.0108) | 0.0272(+0.0137) | 0.0095(+0.0219) | 0.0190(+0.0056) | 0.0088(+0.0153) | 0.0077(+0.0047)              | 0.0165(+0.0004) | 0.0095(+0.0041) | 0.0071(+0.0243) | 0.0085(+0.0048) | 0.0079(+0.0161) |
| IK                     | 0.0468(+0.0011)              | 0.0828(+0.0293) | 0.0868(+0.0479) | 0.0527(+0.0306) | 0.0817(+0.0236) | 0.0342(+0.0226) | 0.0449(+0.0029)              | 0.0939(+0.0183) | 0.0652(+0.0696) | 0.0508(+0.0326) | 0.0691(+0.0363) | 0.0312(+0.0257) |
| QB                     | 0.0384(+0.0017)              | 0.0578(+0.0174) | 0.0623(+0.0595) | 0.0307(+0.0167) | 0.0465(+0.0258) | 0.0238(+0.0145) | 0.0260(+0.0141)              | 0.0437(+0.0315) | 0.0337(+0.0880) | 0.0246(+0.0228) | 0.0242(+0.0411) | 0.0118(+0.0265) |
| WV2                    | 0.1483(+0.0105)              | 0.1936(+0.0231) | 0.2512(+0.0482) | 0.0497(+0.0067) | 0.0823(+0.0127) | 0.0304(+0.0147) | 0.1022(+0.0567)              | 0.1735(+0.0432) | 0.1766(+0.0264) | 0.0546(+0.0019) | 0.0819(+0.0131) | 0.0412(+0.0038) |
| WV3                    | 0.1825(+0.0195)              | 0.2296(+0.0332) | 0.3082(+0.0292) | 0.0254(+0.0056) | 0.0816(+0.0044) | 0.0506(+0.0035) | 0.1493(+0.0137)              | 0.1800(+0.0528) | 0.2857(+0.0517) | 0.0511(+0.0070) | 0.0762(+0.0010) | 0.0427(+0.0113) |
| WV4                    | 0.0891(+0.0121)              | 0.0790(+0.0248) | 0.1495(+0.0772) | 0.0341(+0.0047) | 0.0505(+0.0062) | 0.0279(+0.0046) | 0.0570(+0.0442)              | 0.1099(+0.0061) | 0.1058(+0.1210) | 0.0393(+0.0005) | 0.0558(+0.0009) | 0.0260(+0.0065) |
| $D_P \downarrow$       | $\rho_t = \mathcal{N}(0, 1)$ |                 |                 |                 |                 |                 | $\rho_t = \mathcal{U}(0, 1)$ |                 |                 |                 |                 |                 |
|                        | GF1                          | IK              | QB              | WV2             | WV3             | WV4             | GF1                          | IK              | QB              | WV2             | WV3             | WV4             |
| GF1                    | 0.0298(+0.0061)              | 0.0823(+0.0274) | 0.0216(+0.0089) | 0.0480(+0.0607) | 0.0309(+0.0206) | 0.0209(+0.0477) | 0.0142(+0.0217)              | 0.0624(+0.0473) | 0.0278(+0.0027) | 0.0372(+0.0715) | 0.0267(+0.0249) | 0.0330(+0.0355) |
| IK                     | 0.0941(+0.0050)              | 0.1190(+0.0193) | 0.1257(+0.0758) | 0.1554(+0.0097) | 0.1408(+0.0120) | 0.0904(+0.0102) | 0.0751(+0.0239)              | 0.1229(+0.0153) | 0.0948(+0.1067) | 0.0636(+0.0820) | 0.0851(+0.0678) | 0.0716(+0.0290) |
| QB                     | 0.0789(+0.0050)              | 0.0477(+0.0491) | 0.0848(+0.0683) | 0.0594(+0.0277) | 0.0699(+0.0365) | 0.0573(+0.0191) | 0.0426(+0.0413)              | 0.0243(+0.0725) | 0.0575(+0.0955) | 0.0213(+0.0357) | 0.0232(+0.0802) | 0.0376(+0.0388) |
| WV2                    | 0.1691(+0.0294)              | 0.2059(+0.0491) | 0.2850(+0.0017) | 0.0066(+0.0396) | 0.0969(+0.0740) | 0.0816(+0.0497) | 0.1677(+0.0309)              | 0.1800(+0.0369) | 0.2800(+0.0067) | 0.0697(+0.0055) | 0.1003(+0.0706) | 0.0494(+0.0218) |
| WV3                    | 0.2888(+0.0444)              | 0.2819(+0.0142) | 0.3951(+0.0222) | 0.2408(+0.0874) | 0.1832(+0.0232) | 0.1565(+0.0114) | 0.2060(+0.0384)              | 0.2296(+0.0664) | 0.3240(+0.0434) | 0.0486(+0.0688) | 0.0918(+0.1146) | 0.0981(+0.0698) |
| WV4                    | 0.1168(+0.0127)              | 0.1015(+0.0406) | 0.1595(+0.1040) | 0.0929(+0.0560) | 0.1024(+0.0285) | 0.0334(+0.0122) | 0.0730(+0.0565)              | 0.1209(+0.0212) | 0.1397(+0.1427) | 0.0293(+0.0139) | 0.0374(+0.0365) | 0.0258(+0.0207) |



Table 11. Results of UAPN [12]. Rows correspond to training satellites, and columns correspond to testing satellites. **Green** indicates performance improvement, while **red** indicates performance degradation. The values in parentheses represent the average delta compared to the baseline without UniPAN.

| QNR↑                   | $\rho_t = \mathcal{N}(0, 1)$ |                 |                 |                 |                 |                 | $\rho_t = \mathcal{U}(0, 1)$ |                 |                 |                 |                 |                 |
|------------------------|------------------------------|-----------------|-----------------|-----------------|-----------------|-----------------|------------------------------|-----------------|-----------------|-----------------|-----------------|-----------------|
|                        | GF1                          | IK              | QB              | WV2             | WV3             | WV4             | GF1                          | IK              | QB              | WV2             | WV3             | WV4             |
| GF1                    | 0.9863(+0.0488)              | 0.9759(+0.0079) | 0.9726(+0.0036) | 0.9763(+0.0371) | 0.9731(+0.0219) | 0.9756(+0.0200) | 0.9919(+0.0544)              | 0.9966(+0.0286) | 0.9971(+0.0282) | 0.9944(+0.0551) | 0.9947(+0.0435) | 0.9955(+0.0399) |
| IK                     | 0.9385(+0.0153)              | 0.8544(+0.0252) | 0.8638(+0.0869) | 0.8811(+0.0189) | 0.8976(+0.0153) | 0.9180(+0.0170) | 0.9512(+0.0280)              | 0.8705(+0.0413) | 0.9234(+0.1465) | 0.9260(+0.0638) | 0.9462(+0.0639) | 0.9119(+0.0109) |
| QB                     | 0.9580(+0.0119)              | 0.9226(+0.0341) | 0.9065(+0.1057) | 0.9361(+0.0240) | 0.9333(+0.0117) | 0.9440(+0.0392) | 0.9478(+0.0017)              | 0.9262(+0.0377) | 0.9492(+0.1484) | 0.9554(+0.0433) | 0.9618(+0.0401) | 0.9546(+0.0499) |
| WV2                    | 0.8992(+0.1030)              | 0.8226(+0.0712) | 0.7477(+0.0637) | 0.9291(+0.0073) | 0.9046(+0.0205) | 0.9031(-0.0256) | 0.8801(+0.0840)              | 0.7913(+0.0399) | 0.7725(+0.0886) | 0.9479(+0.0262) | 0.9302(+0.0461) | 0.8917(-0.0370) |
| WV3                    | 0.8601(+0.0149)              | 0.7439(-0.0332) | 0.7437(+0.1126) | 0.9127(+0.0039) | 0.8907(-0.0037) | 0.8967(-0.0381) | 0.8795(+0.0342)              | 0.8042(+0.0271) | 0.7958(+0.1647) | 0.9213(+0.0125) | 0.9120(+0.0176) | 0.9345(-0.0004) |
| WV4                    | 0.6882(+0.0090)              | 0.8804(+0.0603) | 0.7304(+0.0029) | 0.9299(-0.0003) | 0.9305(+0.0201) | 0.9622(+0.0127) | 0.8928(+0.0337)              | 0.8227(+0.0026) | 0.8815(+0.1541) | 0.9538(+0.0236) | 0.9393(+0.0289) | 0.9658(+0.0163) |
| $D_\lambda \downarrow$ | $\rho_t = \mathcal{N}(0, 1)$ |                 |                 |                 |                 |                 | $\rho_t = \mathcal{U}(0, 1)$ |                 |                 |                 |                 |                 |
|                        | GF1                          | IK              | QB              | WV2             | WV3             | WV4             | GF1                          | IK              | QB              | WV2             | WV3             | WV4             |
| GF1                    | 0.0043(-0.0254)              | 0.0064(-0.0035) | 0.0047(-0.0044) | 0.0106(-0.0236) | 0.0089(-0.0172) | 0.0089(-0.0119) | 0.0013(-0.0284)              | 0.0011(-0.0088) | 0.0010(-0.0081) | 0.0027(-0.0315) | 0.0029(-0.0232) | 0.0025(-0.0182) |
| IK                     | 0.0146(-0.0014)              | 0.0440(-0.0038) | 0.0282(-0.0260) | 0.0549(+0.0132) | 0.0274(-0.0038) | 0.0276(-0.0074) | 0.0105(-0.0055)              | 0.0331(-0.0147) | 0.0179(-0.0362) | 0.0202(-0.0215) | 0.0094(-0.0218) | 0.0317(-0.0033) |
| QB                     | 0.0113(-0.0019)              | 0.0128(-0.0170) | 0.0212(-0.0281) | 0.0230(-0.0033) | 0.0170(-0.0016) | 0.0198(-0.0132) | 0.0155(+0.0022)              | 0.0143(-0.0155) | 0.0131(-0.0362) | 0.0151(-0.0112) | 0.0091(-0.0095) | 0.0163(-0.0167) |
| WV2                    | 0.0338(-0.0220)              | 0.0560(-0.0074) | 0.0597(-0.0246) | 0.0108(+0.0002) | 0.0131(-0.0007) | 0.0403(+0.0222) | 0.0363(-0.0194)              | 0.0722(+0.0088) | 0.0647(-0.0196) | 0.0059(-0.0048) | 0.0102(-0.0035) | 0.0389(+0.0207) |
| WV3                    | 0.0483(+0.0043)              | 0.0864(+0.0205) | 0.0590(-0.0525) | 0.0298(+0.0008) | 0.0187(+0.0074) | 0.0456(+0.0258) | 0.0344(-0.0096)              | 0.0618(-0.0041) | 0.0448(-0.0667) | 0.0243(-0.0047) | 0.0134(+0.0021) | 0.0191(-0.0006) |
| WV4                    | 0.0416(-0.0000)              | 0.0312(-0.0202) | 0.0745(+0.0029) | 0.0267(+0.0063) | 0.0202(+0.0059) | 0.0075(-0.0052) | 0.0295(-0.0122)              | 0.0457(-0.0057) | 0.0228(-0.0488) | 0.0068(-0.0136) | 0.0081(-0.0062) | 0.0059(-0.0068) |
| $D_S \downarrow$       | $\rho_t = \mathcal{N}(0, 1)$ |                 |                 |                 |                 |                 | $\rho_t = \mathcal{U}(0, 1)$ |                 |                 |                 |                 |                 |
|                        | GF1                          | IK              | QB              | WV2             | WV3             | WV4             | GF1                          | IK              | QB              | WV2             | WV3             | WV4             |
| GF1                    | 0.0094(-0.0269)              | 0.0179(-0.0046) | 0.0229(+0.0007) | 0.0133(-0.0154) | 0.0182(-0.0056) | 0.0158(-0.0085) | 0.0067(-0.0296)              | 0.0024(-0.0201) | 0.0018(-0.0203) | 0.0029(-0.0257) | 0.0024(-0.0214) | 0.0019(-0.0224) |
| IK                     | 0.0477(-0.0146)              | 0.1070(-0.0250) | 0.1114(-0.0095) | 0.0701(-0.0313) | 0.0776(-0.0119) | 0.0569(-0.0102) | 0.0388(-0.0235)              | 0.1007(-0.0312) | 0.0595(-0.1213) | 0.0553(-0.0461) | 0.0448(-0.0448) | 0.0591(-0.0081) |
| QB                     | 0.0310(-0.0103)              | 0.0658(-0.0188) | 0.0741(-0.0850) | 0.0426(-0.0211) | 0.0510(-0.0100) | 0.0372(-0.0279) | 0.0375(-0.0038)              | 0.0607(-0.0238) | 0.0383(-0.1208) | 0.0301(-0.0336) | 0.0248(-0.0316) | 0.0298(-0.0353) |
| WV2                    | 0.0700(-0.0884)              | 0.1341(-0.0675) | 0.2065(-0.0496) | 0.0609(-0.0075) | 0.0836(-0.0203) | 0.0604(+0.0061) | 0.0872(-0.0712)              | 0.1514(-0.0502) | 0.1768(-0.0792) | 0.0465(-0.0219) | 0.0602(-0.0436) | 0.0736(+0.0193) |
| WV3                    | 0.0984(-0.0190)              | 0.1982(+0.0184) | 0.2119(-0.0854) | 0.0601(-0.0041) | 0.0925(-0.0031) | 0.0612(+0.0145) | 0.0903(-0.0270)              | 0.1482(-0.0236) | 0.1682(-0.1291) | 0.0562(-0.0080) | 0.0758(-0.0199) | 0.0475(-0.0008) |
| WV4                    | 0.0957(-0.0088)              | 0.0935(-0.0441) | 0.2156(-0.0042) | 0.0466(-0.0038) | 0.0504(-0.0261) | 0.0306(-0.0078) | 0.0810(-0.0235)              | 0.1392(+0.0017) | 0.0981(-0.1216) | 0.0397(-0.0107) | 0.0532(-0.0233) | 0.0286(-0.0098) |
| $D_p \downarrow$       | $\rho_t = \mathcal{N}(0, 1)$ |                 |                 |                 |                 |                 | $\rho_t = \mathcal{U}(0, 1)$ |                 |                 |                 |                 |                 |
|                        | GF1                          | IK              | QB              | WV2             | WV3             | WV4             | GF1                          | IK              | QB              | WV2             | WV3             | WV4             |
| GF1                    | 0.0274(-0.0386)              | 0.0457(-0.0381) | 0.0170(-0.0329) | 0.0366(-0.0362) | 0.0303(-0.0475) | 0.0286(-0.0387) | 0.0000(-0.0659)              | 0.0000(-0.0838) | 0.0000(-0.0499) | 0.0001(-0.0727) | 0.0001(-0.0777) | 0.0000(-0.0673) |
| IK                     | 0.1108(+0.0029)              | 0.1369(-0.0502) | 0.1474(-0.1007) | 0.1269(-0.0311) | 0.1303(-0.0602) | 0.0822(-0.0494) | 0.0738(-0.0340)              | 0.1304(-0.0567) | 0.0784(-0.1697) | 0.0797(-0.0783) | 0.0701(-0.1204) | 0.0780(-0.0536) |
| QB                     | 0.0610(-0.0122)              | 0.0817(-0.0154) | 0.0705(-0.0932) | 0.0574(-0.0436) | 0.0540(-0.0271) | 0.0468(-0.0401) | 0.0303(-0.0428)              | 0.0766(-0.0205) | 0.0293(-0.1344) | 0.0116(-0.0894) | 0.0151(-0.0660) | 0.0223(-0.0646) |
| WV2                    | 0.1892(+0.0061)              | 0.2287(+0.0243) | 0.2999(+0.0157) | 0.1601(+0.0083) | 0.1942(-0.0223) | 0.1417(+0.0264) | 0.1471(-0.0360)              | 0.2163(+0.0119) | 0.1939(-0.0902) | 0.1587(+0.0069) | 0.1524(-0.0641) | 0.1540(+0.0388) |
| WV3                    | 0.2721(+0.1020)              | 0.2829(+0.0670) | 0.3659(+0.0134) | 0.2021(+0.0313) | 0.2517(+0.0319) | 0.2161(+0.0776) | 0.1448(-0.0253)              | 0.1797(-0.0362) | 0.1958(-0.1567) | 0.2324(+0.0616) | 0.2808(+0.0611) | 0.1217(-0.0168) |
| WV4                    | 0.1404(-0.0281)              | 0.1236(-0.1066) | 0.2046(-0.0771) | 0.2650(+0.1140) | 0.2549(+0.0941) | 0.0595(-0.0766) | 0.0901(-0.0783)              | 0.1508(-0.0793) | 0.1106(-0.1711) | 0.0595(-0.0915) | 0.0727(-0.0882) | 0.0598(-0.0763) |

Table 12. Results of MDCUN [9]. Rows correspond to training satellites, and columns correspond to testing satellites. **Green** indicates performance improvement, while **red** indicates performance degradation. The values in parentheses represent the average delta compared to the baseline without UniPAN.

| QNR↑                   | $\rho_t = \mathcal{N}(0, 1)$ |                 |                 |                 |                 |                 | $\rho_t = \mathcal{U}(0, 1)$ |                 |                 |                 |                 |                 |
|------------------------|------------------------------|-----------------|-----------------|-----------------|-----------------|-----------------|------------------------------|-----------------|-----------------|-----------------|-----------------|-----------------|
|                        | GF1                          | IK              | QB              | WV2             | WV3             | WV4             | GF1                          | IK              | QB              | WV2             | WV3             | WV4             |
| GF1                    | 0.9822(+0.0012)              | 0.9536(+0.0011) | 0.9733(+0.0077) | 0.9819(-0.0006) | 0.9746(-0.0024) | 0.9830(-0.0009) | 0.9875(+0.0041)              | 0.9552(+0.0027) | 0.9725(+0.0069) | 0.9871(+0.0046) | 0.9845(+0.0075) | 0.9853(+0.0014) |
| IK                     | 0.9404(-0.0045)              | 0.8995(+0.0267) | 0.9323(+0.0261) | 0.9449(+0.0082) | 0.9338(+0.0149) | 0.9786(+0.0069) | 0.9535(+0.0086)              | 0.9151(+0.0423) | 0.9381(+0.0319) | 0.9490(+0.0122) | 0.9405(+0.0216) | 0.9730(+0.0013) |
| QB                     | 0.9614(-0.0036)              | 0.9317(+0.0060) | 0.9057(-0.0258) | 0.9690(+0.0073) | 0.9583(+0.0075) | 0.9721(-0.0025) | 0.9802(+0.0153)              | 0.9517(+0.0260) | 0.9798(+0.0483) | 0.9834(+0.0218) | 0.9792(+0.0284) | 0.9898(+0.0152) |
| WV2                    | 0.9280(+0.0410)              | 0.8516(+0.0726) | 0.9230(+0.1117) | 0.9469(+0.0105) | 0.9212(+0.0066) | 0.9660(+0.0238) | 0.8900(+0.0031)              | 0.7973(+0.0182) | 0.8128(+0.0015) | 0.9369(+0.0004) | 0.9039(-0.0107) | 0.9430(+0.0008) |
| WV3                    | 0.9187(+0.0129)              | 0.9042(+0.0773) | 0.9368(+0.1212) | 0.9296(-0.0159) | 0.8998(-0.0076) | 0.9795(+0.0286) | 0.9012(-0.0045)              | 0.8254(-0.0015) | 0.8317(+0.0161) | 0.9378(-0.0077) | 0.9103(+0.0029) | 0.9566(+0.0056) |
| WV4                    | 0.9429(+0.0080)              | 0.9089(+0.0335) | 0.9419(+0.0488) | 0.9603(+0.0082) | 0.9362(+0.0123) | 0.9787(+0.0111) | 0.9396(+0.0046)              | 0.8706(-0.0048) | 0.8900(-0.0031) | 0.9544(+0.0024) | 0.9345(+0.0106) | 0.9712(+0.0036) |
| $D_\lambda \downarrow$ | $\rho_t = \mathcal{N}(0, 1)$ |                 |                 |                 |                 |                 | $\rho_t = \mathcal{U}(0, 1)$ |                 |                 |                 |                 |                 |
|                        | GF1                          | IK              | QB              | WV2             | WV3             | WV4             | GF1                          | IK              | QB              | WV2             | WV3             | WV4             |
| GF1                    | 0.0067(+0.0016)              | 0.0157(+0.0038) | 0.0035(-0.0013) | 0.0081(+0.0022) | 0.0068(+0.0020) | 0.0059(+0.0008) | 0.0036(-0.0015)              | 0.0115(-0.0004) | 0.0032(-0.0016) | 0.0037(-0.0022) | 0.0033(-0.0014) | 0.0045(-0.0005) |
| IK                     | 0.0171(+0.0051)              | 0.0213(-0.0108) | 0.0138(-0.0030) | 0.0180(+0.0025) | 0.0121(-0.0012) | 0.0049(-0.0017) | 0.0092(-0.0028)              | 0.0166(-0.0155) | 0.0116(-0.0052) | 0.0098(-0.0057) | 0.0077(-0.0055) | 0.0082(+0.0017) |
| QB                     | 0.0102(+0.0002)              | 0.0102(-0.0017) | 0.0218(+0.0116) | 0.0071(-0.0034) | 0.0057(-0.0020) | 0.0080(+0.0001) | 0.0049(-0.0051)              | 0.0068(-0.0051) | 0.0033(-0.0069) | 0.0024(-0.0080) | 0.0027(-0.0050) | 0.0025(-0.0054) |
| WV2                    | 0.0259(-0.0121)              | 0.0470(-0.0350) | 0.0172(-0.0271) | 0.0135(+0.0031) | 0.0185(+0.0055) | 0.0095(-0.0088) | 0.0375(-0.0005)              | 0.0681(-0.0139) | 0.0495(+0.0052) | 0.0106(+0.0002) | 0.0180(+0.0050) | 0.0167(-0.0016) |
| WV3                    | 0.0323(+0.0047)              | 0.0277(-0.0259) | 0.0133(-0.0307) | 0.0262(+0.0145) | 0.0331(+0.0172) | 0.0056(-0.0092) | 0.0317(+0.0040)              | 0.0560(+0.0024) | 0.0356(-0.0084) | 0.0145(+0.0028) | 0.0150(-0.0009) | 0.0110(-0.0038) |
| WV4                    | 0.0214(+0.0029)              | 0.0228(-0.0117) | 0.0109(-0.0086) | 0.0104(+0.0022) | 0.0186(+0.0090) | 0.0042(-0.0023) | 0.0144(-0.0042)              | 0.0334(-0.0011) | 0.0223(+0.0028) | 0.0065(-0.0017) | 0.0079(-0.0017) | 0.0050(-0.0014) |
| $D_S \downarrow$       | $\rho_t = \mathcal{N}(0, 1)$ |                 |                 |                 |                 |                 | $\rho_t = \mathcal{U}(0, 1)$ |                 |                 |                 |                 |                 |
|                        | GF1                          | IK              | QB              | WV2             | WV3             | WV4             | GF1                          | IK              | QB              | WV2             | WV3             | WV4             |
| GF1                    | 0.0112(-0.0003)              | 0.0312(-0.0048) | 0.0234(-0.0065) | 0.0101(-0.0016) | 0.0187(+0.0004) | 0.0113(+0.0001) | 0.0089(-0.0026)              | 0.0337(-0.0023) | 0.0244(-0.0055) | 0.0092(-0.0025) | 0.0122(-0.0061) | 0.0102(-0.0009) |
| IK                     | 0.0436(-0.0004)              | 0.0822(-0.0171) | 0.0551(-0.0236) | 0.0380(-0.0106) | 0.0549(-0.0140) | 0.0166(-0.0054) | 0.0379(-0.0060)              | 0.0696(-0.0296) | 0.0511(-0.0275) | 0.0416(-0.0070) | 0.0522(-0.0167) | 0.0190(-0.0029) |
| QB                     | 0.0288(+0.0035)              | 0.0590(-0.0044) | 0.0743(+0.0153) | 0.0241(-0.0041) | 0.0362(-0.0057) | 0.0201(+0.0024) | 0.0150(-0.0104)              | 0.0419(-0.0215) | 0.0170(-0.0420) | 0.0141(-0.0141) | 0.0181(-0.0237) | 0.0077(-0.0099) |
| WV2                    | 0.0477(-0.0309)              | 0.1086(-0.0457) | 0.0612(-0.0911) | 0.0402(-0.0135) | 0.0615(-0.0120) | 0.0248(-0.0157) | 0.0759(-0.0026)              | 0.1471(-0.0072) | 0.1460(-0.0063) | 0.0531(-0.0006) | 0.0798(+0.0062) | 0.0412(+0.0007) |
| WV3                    | 0.0536(-0.0154)              | 0.0714(-0.0571) | 0.0508(-0.0972) | 0.0458(+0.0023) | 0.0700(-0.0082) | 0.0149(-0.0199) | 0.0698(+0.0007)              | 0.1283(-0.0002) | 0.1384(-0.0096) | 0.0485(+0.0050) | 0.0762(-0.0021) | 0.0329(-0.0020) |
| WV4                    | 0.0370(-0.0107)              | 0.0709(-0.0237) | 0.0479(-0.0416) | 0.0298(-0.0103) | 0.0463(-0.0210) | 0.0172(-0.0090) | 0.0470(-0.0007)              | 0.1008(+0.0062) | 0.0902(+0.0007) | 0.0394(-0.0008) | 0.0581(-0.0091) | 0.0240(-0.0022) |
| $D_p \downarrow$       | $\rho_t = \mathcal{N}(0, 1)$ |                 |                 |                 |                 |                 | $\rho_t = \mathcal{U}(0, 1)$ |                 |                 |                 |                 |                 |
|                        | GF1                          | IK              | QB              | WV2             | WV3             | WV4             | GF1                          | IK              | QB              | WV2             | WV3             | WV4             |
| GF1                    | 0.0532(+0.0084)              | 0.1301(+0.0534) | 0.0276(-0.0087) | 0.0788(+0.0340) | 0.0656(+0.0163) | 0.0380(+0.0079) | 0.0262(-0.0186)              | 0.0730(-0.0036) | 0.0283(-0.0080) | 0.0171(-0.0277) | 0.0202(-0.0291) | 0.0179(-0.0121) |
| IK                     | 0.1293(+0.0478)              | 0.1316(-0.0001) | 0.0895(-0.0107) | 0.1293(+0.0215) | 0.1253(+0.0173) | 0.0634(+0.0151) | 0.0765(-0.0050)              | 0.0948(-0.0369) | 0.0723(-0.0279) | 0.0597(-0.0481) | 0.0769(-0.0311) | 0.0414(-0.0069) |
| QB                     | 0.0708(+0.0193)              | 0.0745(-0.0016) | 0.1203(+0.0410) | 0.0514(+0.0121) | 0.0619(+0.0101) | 0.0449(+0.0182) | 0.0276(-0.0239)              | 0.0596(-0.0165) | 0.0203(-0.0590) | 0.0110(-0.0283) | 0.0147(-0.0471) | 0.0168(-0.0100) |
| WV2                    | 0.1465(-0.0400)              | 0.1767(-0.0724) | 0.0904(-0.1459) | 0.2060(+0.0895) | 0.1933(+0.0895) | 0.0913(-0.024)  | 0.1725(-0.0139)              | 0.2346(-0.0146) | 0.2391(+0.0028) | 0.1204(+0.0038) | 0.1535(-0.0322) | 0.1174(-0.0003) |
| WV3                    | 0.1444(-0.0218)              | 0.1304(-0.0889) | 0.0645(-0.1605) | 0.3210(+0.2429) | 0.2404(+0.1013) | 0.0500(-0.0525) | 0.1511(-0.0152)              | 0.2130(-0.0064) | 0.1261(-0.0233) | 0.1060(-0.0279) | 0.1593(+0.0202) | 0.0930(-0.0095) |
| WV4                    | 0.1208(+0.0198)              | 0.1366(-0.0188) | 0.0605(-0.1606) | 0.1677(+0.0985) | 0.1590(+0.0976) | 0.0578(-0.0093) | 0.0835(-0.0175)              | 0.1450(-0.0084) | 0.2158(+0.0088) | 0.0539(-0.0154) | 0.0670(-0.0304) | 0.0471(-0.0114) |
